# Supplementary material for: Size-dependent properties and unusual reactivity of novel nonplanar heterocycloarenes
Source: Royal Society of Chemistry journal article supplement (doi:10.1039/d2sc03167a), 2022-01-01
Supplement: d2sc03167a1.pdf [file d2sc03167a1.pdf]

*Supporting Information*

**Size-dependent properties and unusual reactivity of novel  
nonplanar heterocycloarenes**

Jiangyu Zhu,<sup>a</sup> Wenhao Li,<sup>a</sup> Ning Zhang,<sup>a</sup> Dongyue An,<sup>a</sup> Yan Zhao,<sup>a</sup> Xuefeng Lu,<sup>\*,a</sup>  
and Yunqi Liu<sup>\*,a</sup>

<sup>a</sup>Department of Materials Science, Fudan University, Shanghai 200433, China.

\*E-mail: luxf@fudan.edu.cn; liuyq@fudan.edu.cn

**Table of Contents**

|                                                                                      |     |
|--------------------------------------------------------------------------------------|-----|
| 1. Experimental Section.....                                                         | S2  |
| 1.1 General.....                                                                     | S2  |
| 1.2 Synthetic procedures and characterization data.....                              | S3  |
| 1.3 OFET fabrication and characterization.....                                       | S8  |
| 2. Additional spectra.....                                                           | S9  |
| 3. Theoretical calculations.....                                                     | S16 |
| 4. X-ray crystallographic data.....                                                  | S23 |
| 5. <sup>1</sup> H, <sup>13</sup> C NMR and mass spectra of the target compounds..... | S25 |
| 6. Reference.....                                                                    | S35 |

## 1. Experimental Section

### 1.1 General

Unless special mention, all the chemicals and reagents were purchased from commercial sources and used without further purification. Anhydrous THF were distilled from sodium-benzophenone immediately prior to use. Precursors **1**<sup>1</sup> and **2**<sup>2</sup> were prepared according to literature procedures. All the reactions and manipulations under nitrogen were by using standard inert atmosphere and Schlenk techniques.

The <sup>1</sup>H NMR and <sup>13</sup>C NMR spectra were recorded in solution of CDCl<sub>3</sub>/CD<sub>2</sub>Cl<sub>2</sub> on a Varian Mercury Plus-400 spectrometer, with tetramethylsilane (TMS) as the internal standard. The splitting patterns are designated as follows: s (singlet); d (doublet); t (triplet); and m (multiplet). 2D NOESY NMR spectra were measured on a Bruker AVANCE III HD spectrometer. High resolution mass spectroscopies (HRMS) were recorded on a Thermo Scientific Q Exactive hybrid quadrupole-Orbitrap mass spectrometer, equipped with atmospheric pressure chemical ionization (APCI) source. MALDI-TOF mass spectra (MS) were recorded on a Bruker amazon instrument. Ultraviolet-visible (UV-vis) absorption spectra were measured on a PerkinElmer Lambda-750 spectrophotometer. Fluorescence spectra were recorded on an Edinburgh fluorescence spectrometer. Quantum yield were calculated using the quinine sulfate in 0.1 mol/L H<sub>2</sub>SO<sub>4</sub>-toluene (QY = 54%) as standard, with an absorbance less than 0.05 at 350 nm as a reference. The electrochemical measurements were carried out in anhydrous DCM with 0.1 M tetrabutylammonium hexafluorophosphate (*n*-Bu<sub>4</sub>NPF<sub>6</sub>) as the supporting electrolyte at room temperature under the protection of nitrogen. A glass carbon disk was used as working electrode, a platinum wire was used as counting electrode, and Ag/Ag<sup>+</sup> electrode as reference electrode. Redox couple ferrocenium/ferrocene was used as an internal standard.

## 1.2 Synthetic procedures and characterization data

### Synthesis of macrocycles **3a** and **3b** by Suzuki coupling reaction.

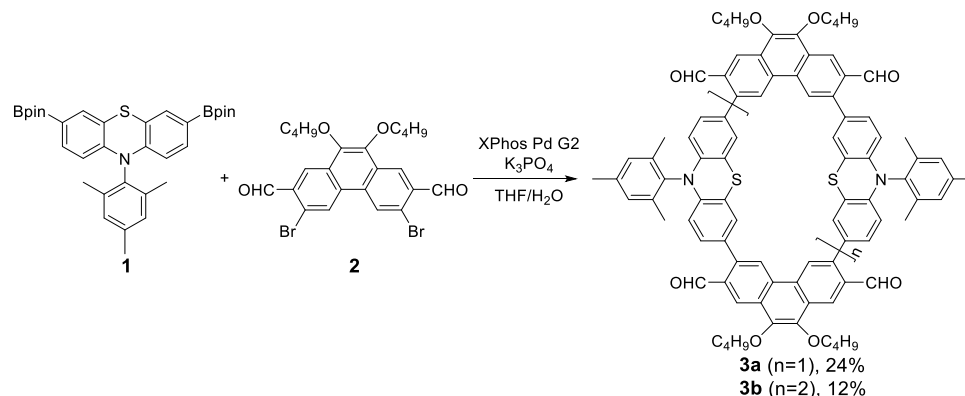

Compound **1**<sup>1</sup> was prepared according to literature procedure. Compound **2**<sup>2</sup> was synthesized similarly according to literature procedure. Under a nitrogen atmosphere, **1** (212 mg, 373  $\mu$ mol), **2** (200 mg, 373  $\mu$ mol), XPhos Pd G2 (50 mg, 63.5  $\mu$ mol) and THF (200 mL) were carefully degassed before  $K_3PO_4$  (12.8 g) dissolved in deionized water (200 mL) was added. The mixture was stirred at 55 °C for 24h. After being cooled to room temperature, the organic solvent was removed under reduced pressure, then  $H_2O$  and DCM were added. The organic layer was separated, dried over anhydrous  $MgSO_4$ , filtered and concentrated to afford the crude product, which was purified by column chromatography (silica gel, DCM/petroleum ether/ethyl acetate = 5:1:0.6) to remove catalysts. And then further purified by preparative GPC using  $CHCl_3$  at a rate of 16 mL/min. Orange solid macrocycle **3a** was obtained in 24% yield (60 mg).  $^1H$  NMR (400 MHz,  $CDCl_3$ )  $\delta$  10.21 (s, 4H), 8.89 (s, 4H), 8.72 (s, 4H), 7.50 (s, 4H), 7.14 (s, 4H), 6.80 (d,  $J = 8.2$  Hz, 4H), 6.14 (d,  $J = 8.3$  Hz, 4H), 4.27 (d,  $J = 6.6$  Hz, 8H), 2.41 (s, 6H), 2.27 (s, 12H), 1.92 (dd,  $J = 14.2, 6.7$  Hz, 8H), 1.67 – 1.61 (m, 8H), 1.04 (t,  $J = 7.3$  Hz, 12H).  $^{13}C$  NMR (101 MHz,  $CDCl_3$ )  $\delta$  192.24, 144.16, 142.29, 140.30, 139.12, 134.32, 132.87, 132.77, 132.61, 131.55, 131.26, 130.82, 130.29, 127.36, 125.82, 124.13, 119.88, 114.22, 73.96, 32.66, 29.93, 19.62, 18.21, 14.21. HRMS (APCI,  $m/z$ ):  $[M]$  calcd for  $C_{90}H_{82}N_2O_8S_2$ , 1383.5585; found, 1383.5551. Orange solid macrocycle **3b** was obtained in 12% yield (30 mg).  $^1H$  NMR (400 MHz,  $CDCl_3$ )  $\delta$  10.19 (s, 6H), 8.88 (s, 6H), 8.59 (s, 6H), 7.13 (s, 6H), 7.02 (s, 6H), 6.87 (d,  $J = 8.5$  Hz, 6H), 6.04 (d,  $J = 8.4$  Hz, 6H), 4.27 (t,  $J = 6.6$  Hz, 12H), 2.39 (s, 9H), 2.31 (s, 18H), 1.98 – 1.88 (m,

12H), 1.62 (dd,  $J = 14.9, 7.4$  Hz, 12H), 1.04 (t,  $J = 7.3$  Hz, 18H).  $^{13}\text{C}$  NMR (101 MHz,  $\text{CDCl}_3$ )  $\delta$  192.36, 144.12, 141.10, 140.88, 139.02, 137.96, 134.41, 133.18, 132.31, 131.17, 130.82, 130.45, 129.86, 127.82, 125.67, 123.74, 118.73, 114.24, 73.97, 32.64, 21.41, 19.62, 18.28, 14.22. HRMS (APCI,  $m/z$ ):  $[\text{M}]$  calcd for  $\text{C}_{135}\text{H}_{123}\text{N}_3\text{O}_{12}\text{S}_3$ , 2074.8342; found, 2074.8281.

### Synthesis of compound 4a.

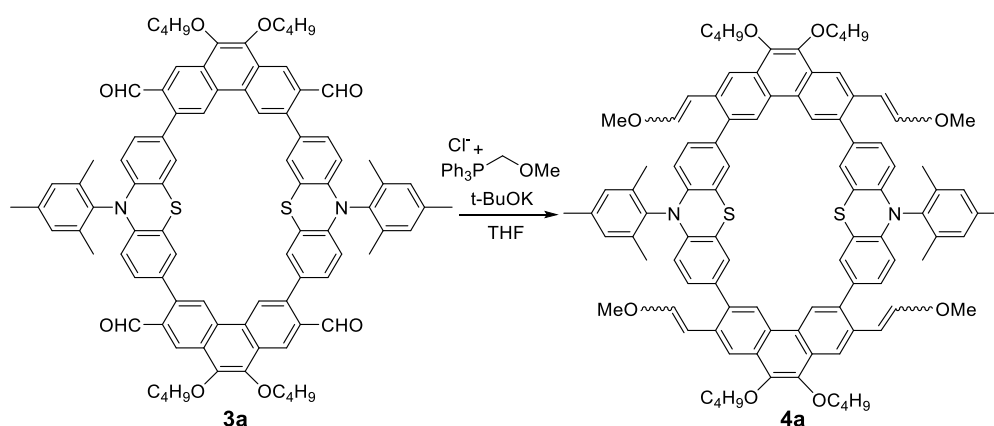

Under nitrogen atmosphere, to 100 mL Schlenk flask were added a solution of methoxymethyltriphenyl-phosphonium chloride (686mg, 2.67 mmol) in anhydrous THF (30 mL) at 0 °C was added t-BuOK (2 mL, 2M in THF). After stirring for 30 mins, the solution of **3a** (30 mg, 22  $\mu\text{mol}$ ) in anhydrous THF (20mL) was added and stirred at room temperature for overnight. The reaction solution was quenched by brine and extracted by DCM. The organic layer was separated, dried over anhydrous  $\text{MgSO}_4$ , filtered and concentrated to afford the crude product, which was purified by flash column chromatography (silica gel, DCM/petroleum ether = 1:1). Yellow solid precursor **4a** was obtained in 86% yield (28 mg).  $^1\text{H}$  NMR (400 MHz,  $\text{CDCl}_3$ )  $\delta$  8.93 (s, 1H), 8.42 (s, 2H), 8.16 (s, 2H), 7.12 (s, 2H), 7.05 (s, 1H), 7.02 (s, 1H), 6.94 (d,  $J = 8.1$  Hz, 2H), 6.16 (d,  $J = 7.7$  Hz, 1H), 6.01 (s, 2H), 5.98 (s, 1H), 5.40 (d,  $J = 7.2$  Hz, 1H), 4.24 (d,  $J = 5.8$  Hz, 4H), 3.82 (s, 3H), 3.62 (s, 3H), 2.40 (s, 3H), 2.26 (s, 6H), 1.91 (d,  $J = 6.5$  Hz, 4H), 1.64 (d,  $J = 7.7$  Hz, 4H), 1.05 (s, 6H).  $^{13}\text{C}$  NMR (101 MHz,  $\text{CDCl}_3$ )  $\delta$  149.39, 148.50, 143.69, 143.24, 143.13, 141.31, 138.48, 137.34, 136.04, 135.00, 132.83, 131.56, 130.52, 129.71, 128.85, 127.96, 127.20, 126.77, 124.16, 123.72,

122.94, 118.74, 118.20, 113.39, 113.28, 105.40, 104.13, 73.50, 60.93, 57.23, 33.00, 32.84, 31.75, 30.38, 29.94, 21.40, 19.78, 18.30, 14.29. HRMS (APCI, m/z): [M] calcd for C<sub>98</sub>H<sub>98</sub>N<sub>2</sub>O<sub>8</sub>S<sub>2</sub>, 1495.6837; found, 1495.6809.

### Synthesis of compound **4b**.

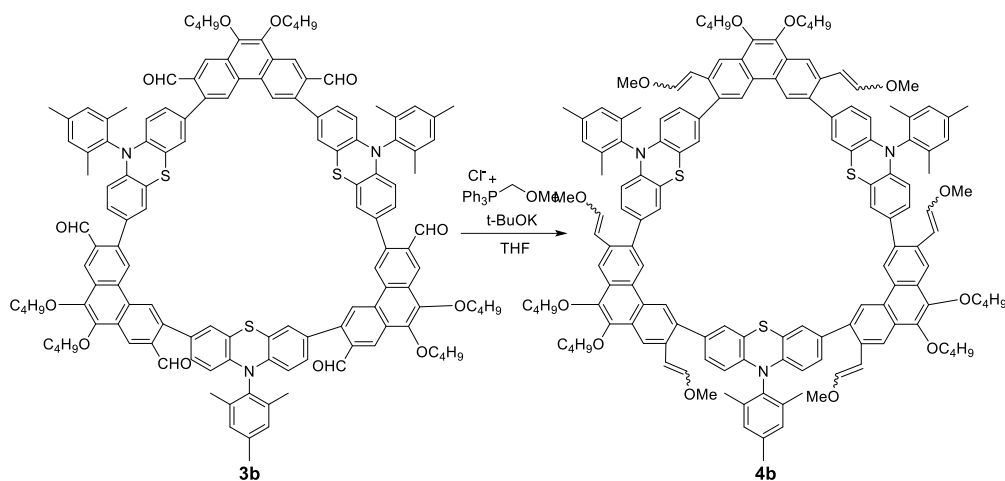

The synthesis of the compound **4b** was same as the procedure of compound **4a**. Yellow solid precursor **4b** was obtained in 89% yield (29 mg). <sup>1</sup>H NMR (400 MHz, CD<sub>2</sub>Cl<sub>2</sub>) δ 8.91 (s, 1H), 8.35 (s, 2H), 8.17 (s, 2H), 7.14 (s, 1H), 7.08 (d, J = 12.8 Hz, 2H), 7.02 (s, 1H), 6.97 (s, 1H), 6.87 (d, J = 12.5 Hz, 2H), 6.27 (d, J = 7.2 Hz, 1H), 5.97 (s, 2H), 5.37 (d, J = 7.3 Hz, 1H), 4.24 (s, 4H), 3.86 (s, 3H), 3.66 (s, 3H), 2.38 (s, 3H), 2.29 (s, 6H), 1.93 (d, J = 6.8 Hz, 4H), 1.65 (d, J = 7.3 Hz, 4H), 1.06 (d, J = 6.5 Hz, 6H). <sup>13</sup>C NMR (101 MHz, CD<sub>2</sub>Cl<sub>2</sub>) δ 149.72, 148.95, 143.20, 138.70, 138.14, 134.94, 130.53, 129.12, 127.53, 126.87, 123.83, 122.72, 117.85, 113.90, 104.80, 103.41, 73.44, 60.98, 57.05, 32.94, 32.81, 29.92, 21.08, 19.77, 17.92, 14.14, 14.04. HRMS (APCI, m/z): [M] calcd for C<sub>147</sub>H<sub>147</sub>N<sub>3</sub>O<sub>12</sub>S<sub>3</sub>, 2243.0220; found, 2243.0098.

## Synthesis of phenothiazine-containing heteroarene **PTZ1**.

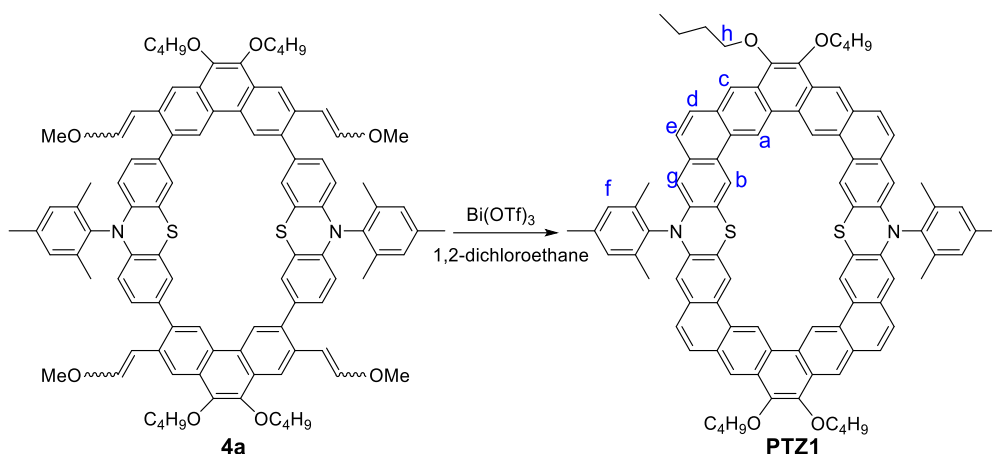

Under nitrogen atmosphere, compound **4a** (28 mg, 19  $\mu\text{mol}$ ),  $\text{Bi}(\text{OTf})_3$  (25 mg, 38  $\mu\text{mol}$ ) and 30 mL dry 1,2-dichloroethane were added in 100 mL flask, and the solution was stirred at room temperature for 3h. The reaction solvent was removed under reduce pressure. The residue was purified by flash column chromatography (silica gel, DCM/petroleum ether = 1:1). Yellow solid phenothiazine-containing heterocycloarene **PTZ1** was obtained in 86% yield (22 mg).  $^1\text{H}$  NMR (400 MHz,  $\text{CDCl}_3$ )  $\delta$  10.30 (s, 4H), 9.16 (s, 4H), 8.54 (s, 4H), 7.78 (d,  $J = 9.1$  Hz, 4H), 7.45 (d,  $J = 9.0$  Hz, 4H), 7.28 (s, 4H), 6.57 (s, 4H), 4.33 (t,  $J = 6.7$  Hz, 8H), 2.55 (s, 6H), 2.31 (s, 12H), 2.02 – 1.94 (m, 8H), 1.68 (dq,  $J = 14.7, 7.4$  Hz, 8H), 1.07 (t,  $J = 7.4$  Hz, 12H).  $^{13}\text{C}$  NMR (101 MHz,  $\text{CDCl}_3$ )  $\delta$  147.31, 143.25, 138.89, 132.28, 130.84, 130.41, 128.85, 128.14, 127.79, 127.34, 126.99, 124.71, 124.22, 122.26, 121.27, 119.32, 116.52, 111.45, 73.53, 32.94, 31.69, 19.79, 18.44, 14.34. HRMS (APCI,  $m/z$ ):  $[\text{M}]$  calcd for  $\text{C}_{94}\text{H}_{82}\text{N}_2\text{O}_4\text{S}_2$ , 1367.5789; found, 1367.5758.

## Synthesis of phenothiazine-containing heteroarene **PTZ2**.

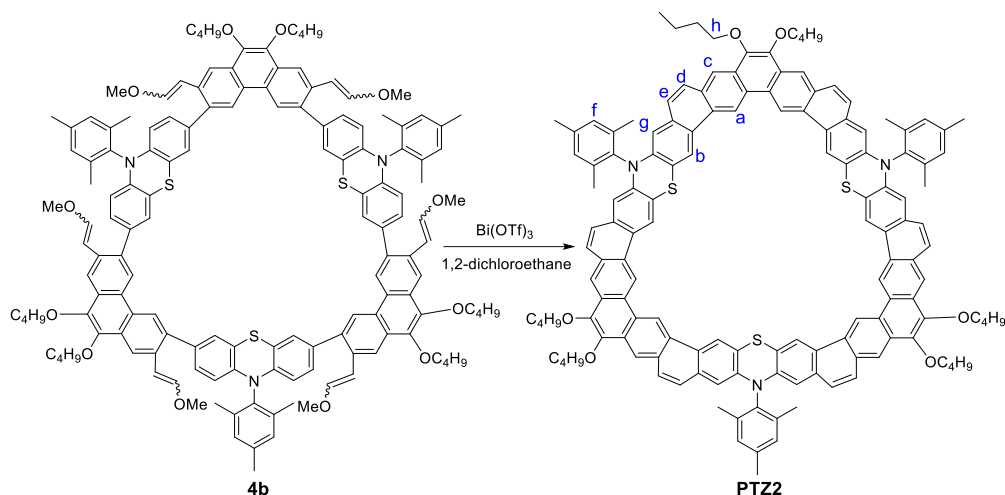

The synthesis of heterocycloarene **PTZ2** was same as the procedure of compound **PTZ1**. Yellow solid **PTZ2** was obtained in 79% yield (21 mg).  $^1\text{H}$  NMR (400 MHz,  $\text{CD}_2\text{Cl}_2$ )  $\delta$  9.72 (s, 6H), 8.76 (s, 6H), 8.57 (s, 6H), 7.73 (d,  $J = 8.9$  Hz, 6H), 7.37 (d,  $J = 8.9$  Hz, 6H), 7.24 (s, 6H), 6.60 (s, 6H), 4.32 (t,  $J = 6.6$  Hz, 12H), 2.48 (s, 9H), 2.32 (s, 18H), 2.01 – 1.92 (m, 12H), 1.66 (dd,  $J = 14.3, 6.8$  Hz, 12H), 1.06 (t,  $J = 7.4$  Hz, 18H).  $^{13}\text{C}$  NMR (101 MHz,  $\text{CDCl}_3$ )  $\delta$  142.16, 140.30, 138.68, 138.37, 135.42, 132.64, 130.78, 130.70, 128.90, 128.75, 128.58, 127.13, 126.87, 121.82, 121.36, 117.39, 112.82, 73.47, 32.86, 21.50, 19.74, 18.59. HRMS (APCI,  $m/z$ ):  $[(M+H)^+]$  calcd for  $\text{C}_{141}\text{H}_{123}\text{N}_3\text{O}_6\text{S}_3$ , 2051.8680; found, 2051.8604.

## Synthesis of compound **PTZ1-Oxi**.

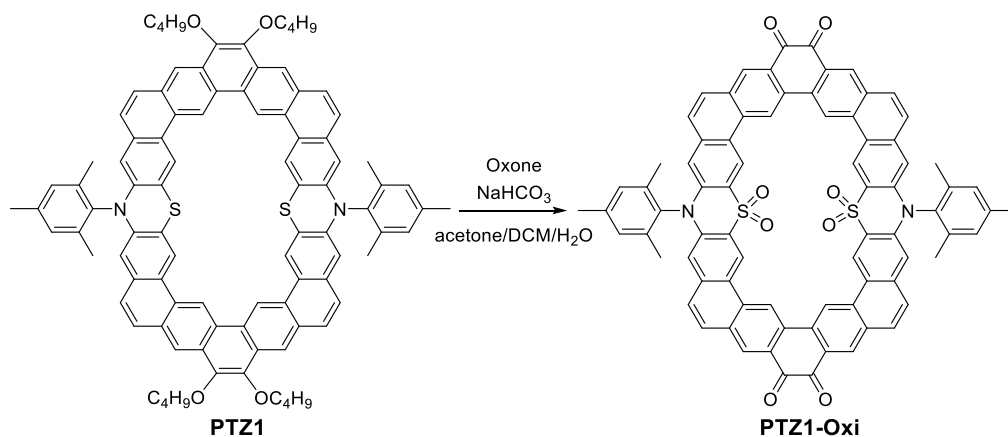

The compound **PTZ1-Oxi** was synthesized similarly to literature procedure.<sup>3</sup> To a solution of heterocycloarene **PTZ1** (30 mg, 21  $\mu\text{mol}$ ) in acetone/DCM/ $\text{H}_2\text{O}$  (3 mL:3

mL;3 mL) was added Oxone (298 mg, 971  $\mu\text{mol}$ ) and  $\text{NaHCO}_3$  (582 mg, 6.93 mmol). The reaction mixture was stirred at room temperature for overnight. The reaction solution was quenched by  $\text{NaHSO}_3$  solution, and extracted by DCM. After removal of the solvent under reduced pressure, the residue was purified by recrystallizing from a mixed solution of  $\text{CHCl}_3/\text{CH}_3\text{OH}$  to afford the desired orange product **PTZ1-Oxi**. The isolated yield: 15% (4.0 mg).  $^1\text{H NMR}$  (400 MHz,  $\text{CDCl}_3$ )  $\delta$  10.28 (s, 4H), 9.97 (s, 4H), 8.80 (s, 4H), 7.89 (d,  $J = 9.1$  Hz, 4H), 7.65 (d,  $J = 9.0$  Hz, 4H), 7.33 (s, 4H), 7.09 (s, 4H), 2.58 (s, 6H), 2.11 (s, 12H). MALDI-TOF Mass:  $m/z$  1203.2, calc. 1202.3.

### 1.3 OFET fabrication and characterization

The  $\text{SiO}_2/\text{Si}$  wafers were first washed with deionized water, hot piranha solution ( $\text{H}_2\text{SO}_4/\text{H}_2\text{O}_2 = 2:1$ ), deionized water, ethanol in sequence, and finally were dried in an oven at  $70^\circ\text{C}$ . For the surface modification, a small drop of octadecyltrichlorosilane (OTS) surrounded by those cleaned  $\text{SiO}_2/\text{Si}$  substrates were put into a Petri dish. Then the dish was placed into a vacuum oven and kept at  $120^\circ\text{C}$  for 3 hours. After cooling to room temperature, OTS self-assembled monolayer was formed on the surface of the  $\text{SiO}_2/\text{Si}$  wafers. Those OTS modified wafers should be washed immediately in turn by hexane, ethanol, and chloroform and finally were blown dry with high-purity nitrogen gas.

Bottom-gate and bottom-contact (BGBT) configuration OTFTs were fabricated by spin-coating on the OTS modified  $\text{Si}/\text{SiO}_2$  substrate. Gold source/drain electrodes were prepared by vacuum deposition through shadow mask to give a defined channel length ( $L = 10 \mu\text{m}$ ) and channel width ( $W = 1.4 \text{ mm}$ ). The **PTZ1** dissolved in chloroform was spun with speed of 3000 rpm for 60 seconds. OTFT devices were measured under glovebox with Keysight 4200. Saturation mobilities were calculated according to the equation.

$$I_{DS} = \frac{W}{2L} C_i \mu (V_{GS} - V_T)^2$$

where  $I_{DS}$  is the drain-source current,  $\mu$  is the field-effect mobility,  $V_G$  is the gate voltage,  $V_T$  is the threshold voltage,  $W$  is the channel width,  $L$  is the channel width length,  $C_i$  is



the capacitance of the insulating layer. In this work, the 300 nm SiO<sub>2</sub> surface layer with the capacitance of 11 nF cm<sup>-2</sup> was employed as the dielectric. OFET characteristics were obtained by applying a gate voltage from -60 V to 10 V, with the drain-source voltage kept at -60 V.

## 2. Additional spectra

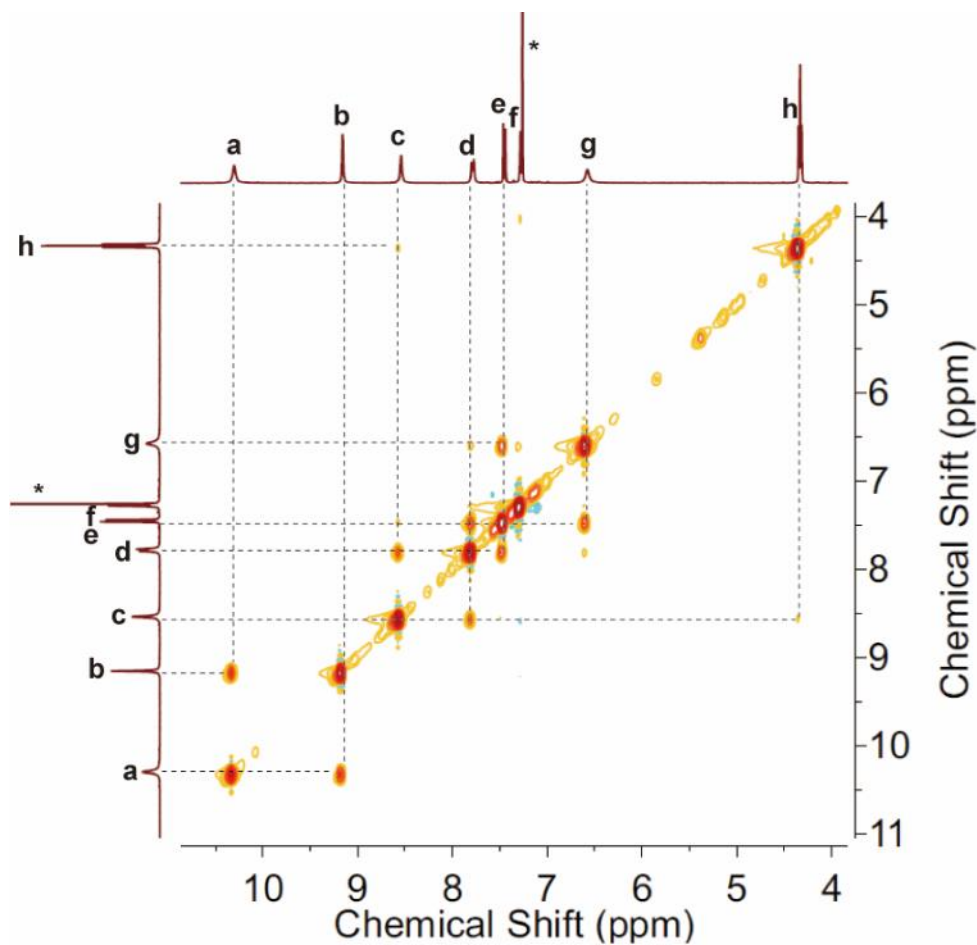

**Figure S1.** 2D NMR NOESY spectra of **PTZ1** in CDCl<sub>3</sub> (500 MHz).

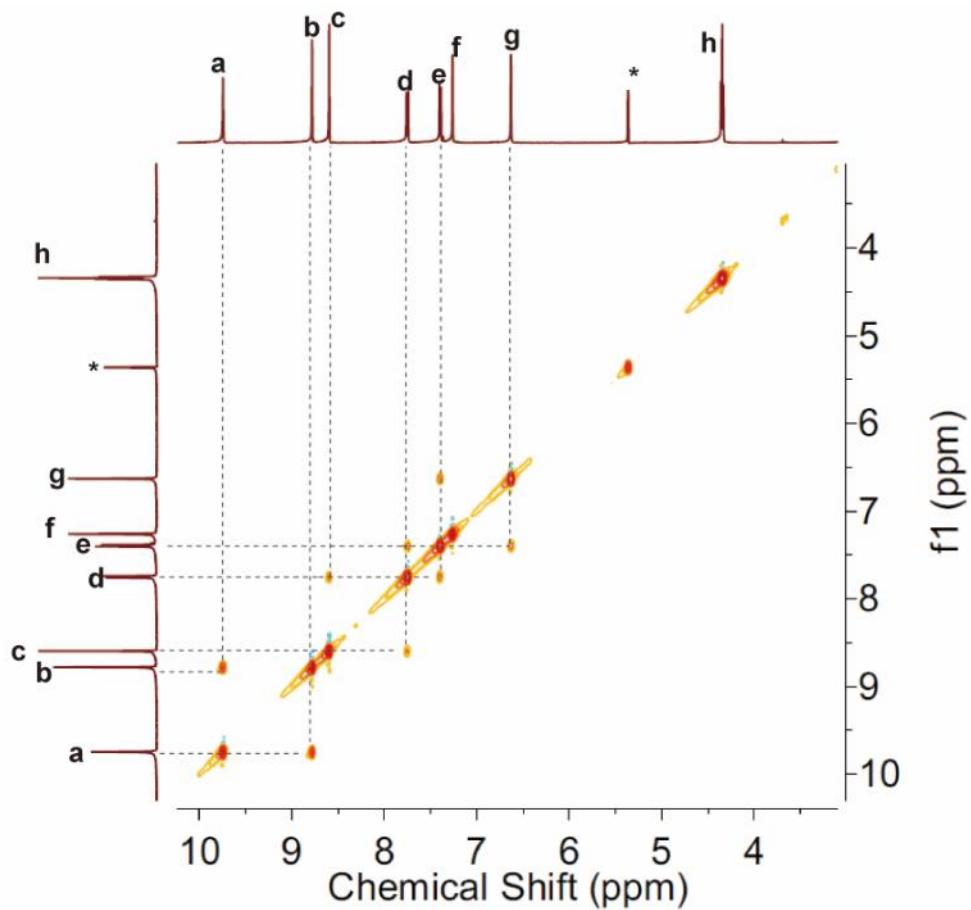

**Figure S2.** 2D NMR NOESY spectra of **PTZ2** in  $\text{CD}_2\text{Cl}_2$  (500 MHz).

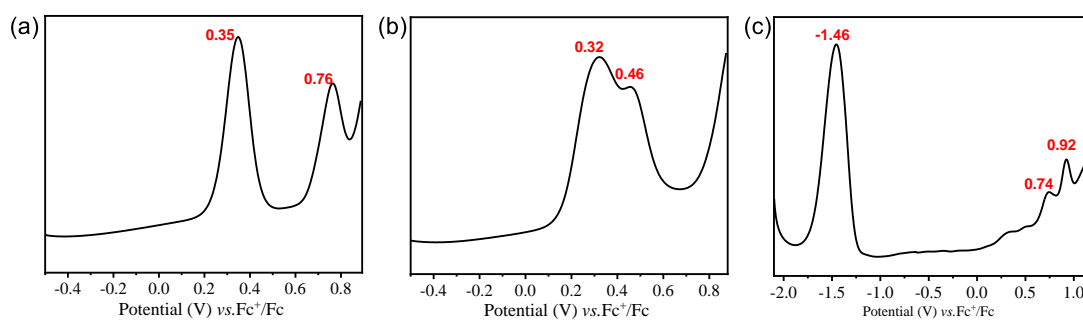

**Figure S3.** Differential pulse voltammograms (DPV) of (a)**PTZ1**, (b)**PTZ2** and (c)**PTZ1-Oxi** in DCM solutions.

**Table S1.** Energy level data of **PTZ1**, **PTZ2** and **PTZ1-Oxi**.

| Comp.           | $\lambda_{\text{onset}}$<br>(nm) <sup>[a]</sup> | $E_g$<br>(eV) <sup>[b]</sup> | $E_{\text{ox}}^{\text{onset}}$<br>(V) <sup>[c]</sup> | $E_{\text{HOMO}}$<br>(eV) <sup>[d]</sup> | $E_{\text{LUMO}}$<br>(eV) <sup>[e]</sup> |
|-----------------|-------------------------------------------------|------------------------------|------------------------------------------------------|------------------------------------------|------------------------------------------|
| <b>PTZ1</b>     | 477                                             | 2.60                         | 0.29                                                 | -5.09                                    | -2.49                                    |
| <b>PTZ2</b>     | 483                                             | 2.57                         | 0.14                                                 | -4.94                                    | -2.37                                    |
| <b>PTZ1-Oxi</b> | 545                                             | 2.28                         | 0.69                                                 | -5.49                                    | -3.21                                    |

[a] Onset absorption wavelength. [b] Optical band gap. [c] Onset oxidation potential. [d] Calculated from  $E_{\text{ox}}^{\text{onset}}$ .  $E_{\text{HOMO}} = -(E_{\text{ox}}^{\text{onset}} + 4.80)$  eV. [e]  $E_{\text{LUMO}} = E_g + E_{\text{HOMO}}$ .

### Fullerene binding NMR studies<sup>4-5</sup>

The host molecule solution of N,S-heterocycloarenes (0.92 mM, CD<sub>2</sub>Cl<sub>2</sub>) were titrated in an NMR tube sealed with a plastic stopper, by adding known quantities (2  $\mu$ L) of a stock solution of fullerene (C<sub>60</sub> or C<sub>70</sub>) in CS<sub>2</sub>. After each addition, the NMR tube was quickly shaken to ensure good mixing of the solutions and then the spectra were recorded. The dilution effect can be ignored during titration to add little enough fullerene solution to the system.

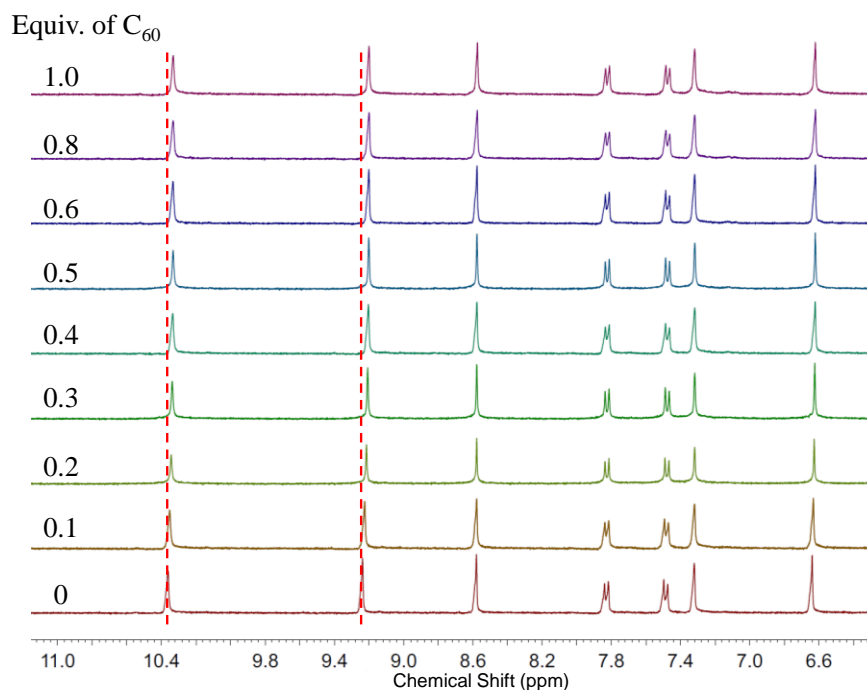**Figure S4.** Partial <sup>1</sup>H NMR (400 MHz, CD<sub>2</sub>Cl<sub>2</sub>) spectra for titration of **PTZ1** with C<sub>60</sub>.

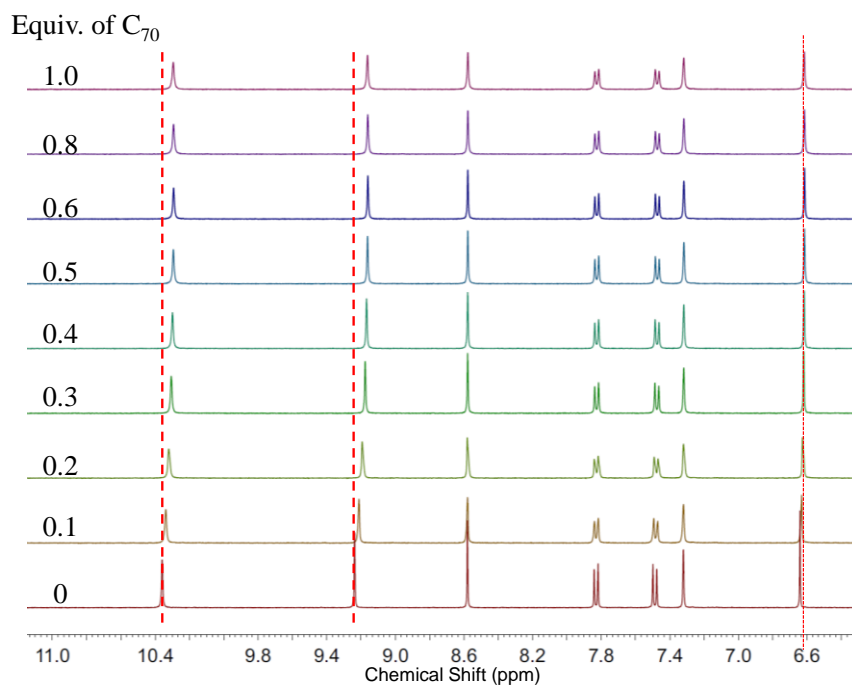

**Figure S5.** Partial  $^1\text{H}$  NMR (400 MHz,  $\text{CD}_2\text{Cl}_2$ ) spectra for titration of **PTZ1** with  $\text{C}_{70}$ .

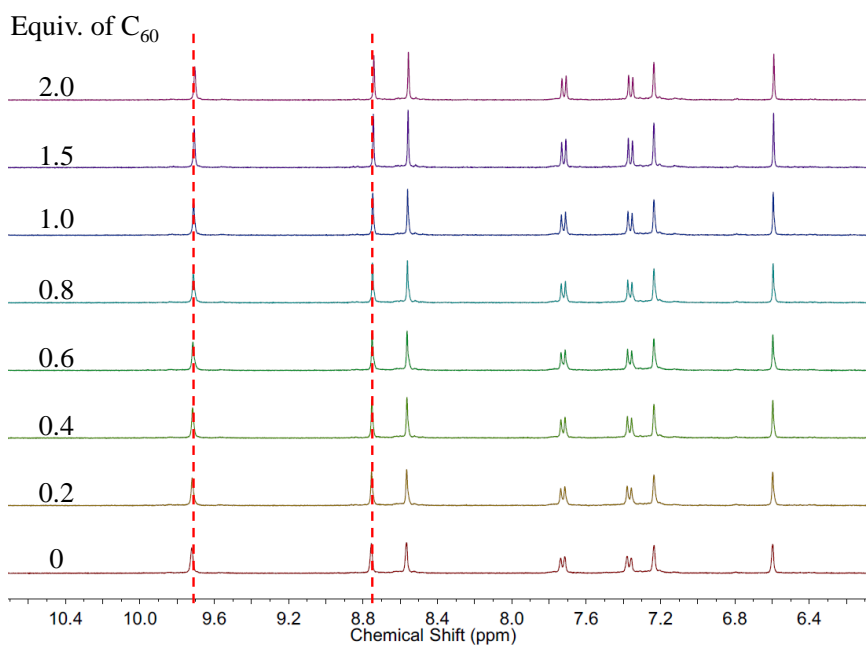

**Figure S6.** Partial  $^1\text{H}$  NMR (400 MHz,  $\text{CD}_2\text{Cl}_2$ ) spectra for titration of **PTZ2** with  $\text{C}_{60}$ .

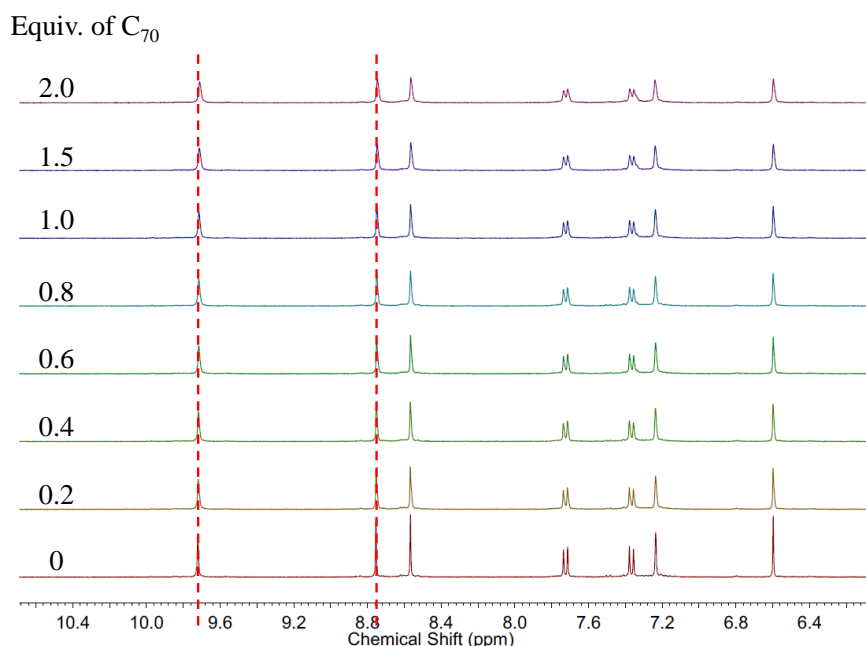

**Figure S7.** Partial  $^1\text{H}$  NMR (400 MHz,  $\text{CD}_2\text{Cl}_2$ ) spectra for titration of **PTZ2** with  $\text{C}_{70}$ .

### Binding constant $K_a$ in $\text{CH}_2\text{Cl}_2$ .

To determine the binding constants between fullerene and heterocycloarenes, the change in the chemical shift of protons located lowest field was monitored. The data can be fitted by using the non-linear curve fitting based on the equation:<sup>6</sup>

$$\Delta F_{\text{obs}} = \frac{k_{\Delta\text{HG}}[\text{G}]K_{11}[\text{H}] + 2k_{\Delta\text{H}_2\text{G}}[\text{G}]_0K_{11}K_{21}[\text{H}]^2}{1 + K_{11}[\text{H}] + K_{11}K_{21}[\text{H}]^2}$$

$\Delta F_{\text{obs}}$  = changes of fluorescence intensity on titration,

$k_{\Delta\text{HG}}$  and  $k_{\Delta\text{H}_2\text{G}}$  = proportional constants for 1:1 and 2:1 complex,

$[\text{H}]$  and  $[\text{G}]$  = total concentrations of the host and guest,

$K_{11}$  and  $K_{21}$  = binding constants for the 1:1 and 2:1 equilibria.

The binding constants were determined by using the program of Pall Thordarson (<http://supramolecular.org>). The program is freely available and is based on Python using the above equation of the 2:1 equilibrium.

**Table S2.** Association constants ( $K_a$ ) of **PTZ1** with fullerenes.

| Compound    | Fullerene | $K_{11}$ ( $M^{-1}$ ) | $K_{21}$ ( $M^{-1}$ ) | $K_a(M^{-2})$      |
|-------------|-----------|-----------------------|-----------------------|--------------------|
| <b>PTZ1</b> | $C_{60}$  | 1.24                  | $6.66 \times 10^6$    | $8.26 \times 10^6$ |
|             | $C_{70}$  | 17.34                 | $9.29 \times 10^5$    | $1.61 \times 10^7$ |

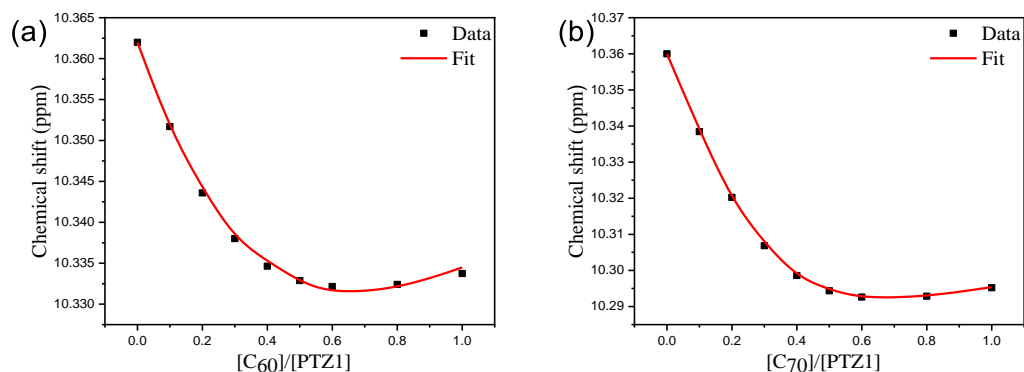

**Figure S8.** Fitting binding isotherm using a 2:1 association model for the titration of heterocycloarenes **PTZ1** with (a)  $C_{60}$  and (b)  $C_{70}$ . The change in the chemical shift for proton  $H_a$ .

#### **Fullerene binding fluorescence titration studies.**

Fluorescence titrations were carried out by adding stock toluene solutions of  $C_{60}$  ( $1.5 \times 10^{-3}$  M) and  $C_{70}$  ( $1.5 \times 10^{-3}$  M) to the solution of **PTZ1** ( $1.0 \times 10^{-5}$  M), respectively. The binding constants were determined by using nonlinear least-squares curve fitting procedure performed with the online software Bindfit on <http://supramolecular.org/> website with a 2:1 global fitting model (Nelder-Mead method).

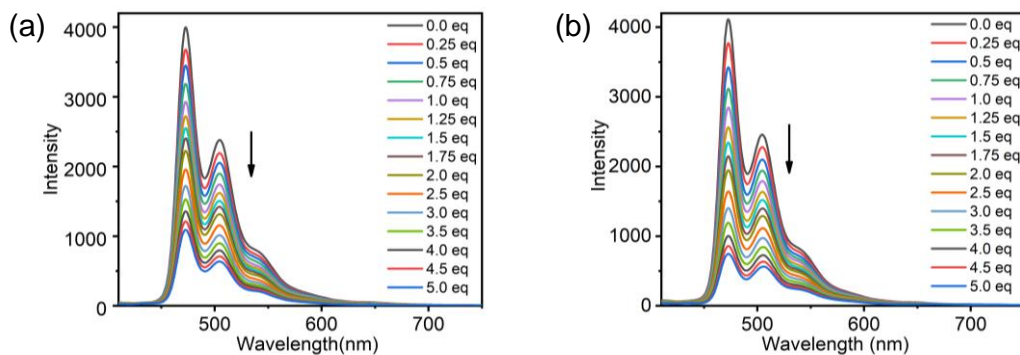

**Figure S9.** Change of the fluorescence spectrum of **PTZ1** upon gradual addition of  $C_{60}$  (a) and  $C_{70}$  (b) in toluene.

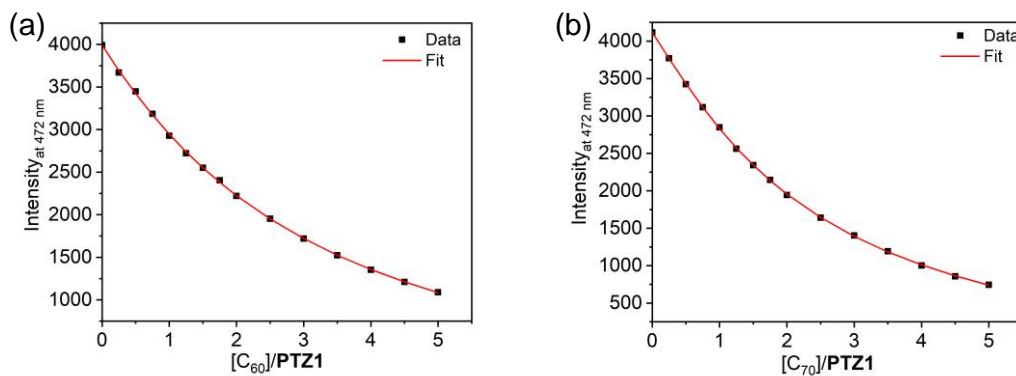

**Figure S10.** Plot of fluorescence changes at 472 nm versus  $[C_{60}]$  (c) and  $[C_{70}]$  (d) in toluene for obtaining  $K_a$ .

**Table S3.** Association constants ( $K_a$ ) of **PTZ1** with fullerenes calculated by fluorescence titration experiments.

| Method                 | Fullerene | $K_{11}$ ( $M^{-1}$ ) | $K_{21}$ ( $M^{-1}$ ) | $K_a$ ( $M^{-2}$ ) |
|------------------------|-----------|-----------------------|-----------------------|--------------------|
| Fluorescence Titration | $C_{60}$  | $4.7 \times 10^4$     | $4.7 \times 10^3$     | $2.21 \times 10^8$ |
|                        | $C_{70}$  | $8.9 \times 10^4$     | $2.6 \times 10^4$     | $2.31 \times 10^9$ |

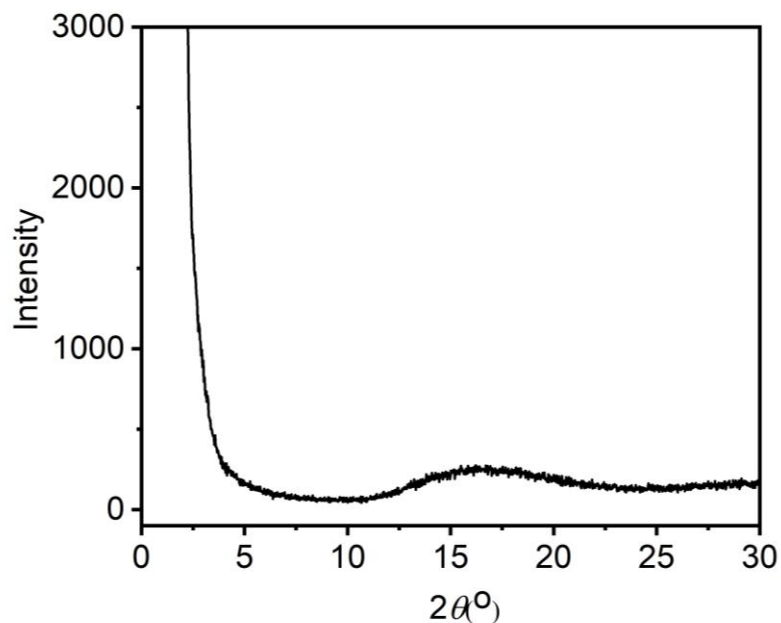

**Figure S11.** XRD pattern of the spin-coating thin film of compound **PTZ1**. X-ray diffraction was recorded on an X-ray diffractometer at room temperature using Cu K $\alpha$  radiation ( $\lambda = 1.5418 \text{ \AA}$ ) with a  $\theta$ - $2\theta$  configuration.

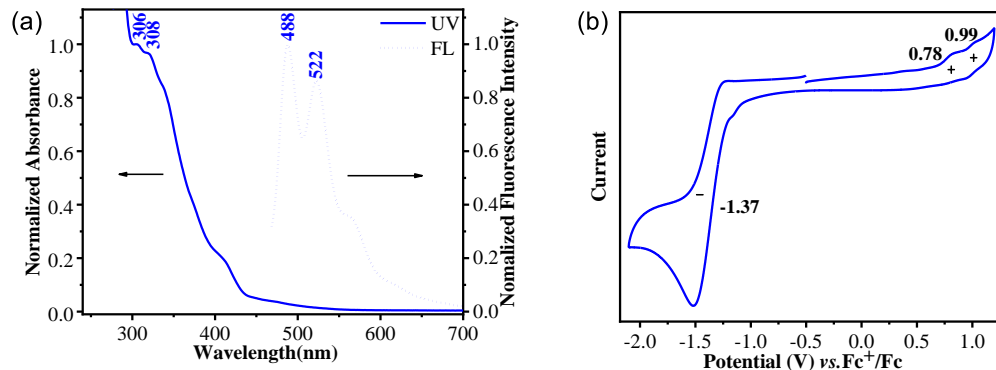

**Figure S12.** Normalized UV-vis absorption and fluorescence spectra of **PTZ1-Oxi** measured in toluene. (b) Cyclic voltammogram of **PTZ1-Oxi** dissolved in dichloromethane.

### 3. Theoretical calculations

Density functional theory (DFT) calculations were performed with the Gaussian09 program suite<sup>8</sup> with Becke's threeparameter hybrid exchange functionals and the Lee-Yang-Parr correlation functional (B3LYP) employing the 6-31G(d,p) basis set for all



atoms.<sup>9-14</sup> Time-dependent DFT (TD-DFT) calculations were performed under the same level of theory and basis set as solvation of toluene. NICS values were calculated by using the standard GIAO procedure (NMR pop=NCSall)<sup>15</sup> with the assistance of Multiwfn.<sup>16</sup> ACID plot was calculated by using the method developed by Herges.<sup>17</sup> Chemical shift of <sup>1</sup>H NMR in chloroform were calculated at the B97-2/pcSseg-1 level of theory.<sup>18</sup>

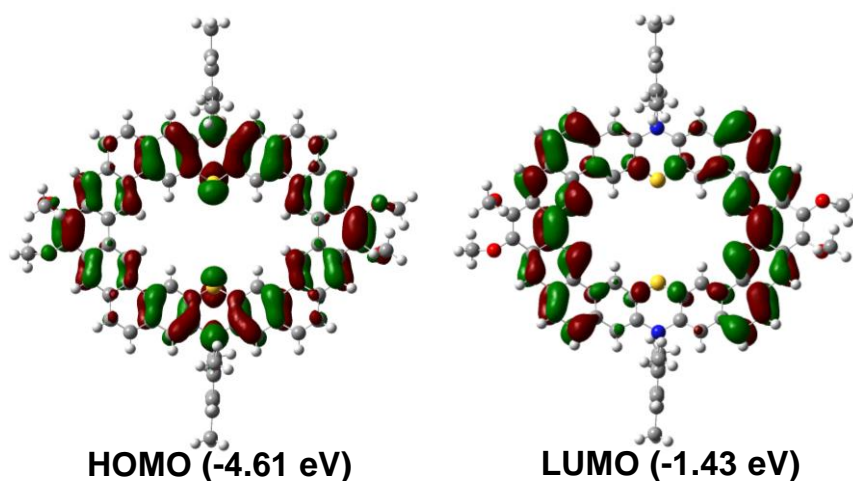

**Figure S13.** Calculated frontier orbitals and energy levels of PTZ1.

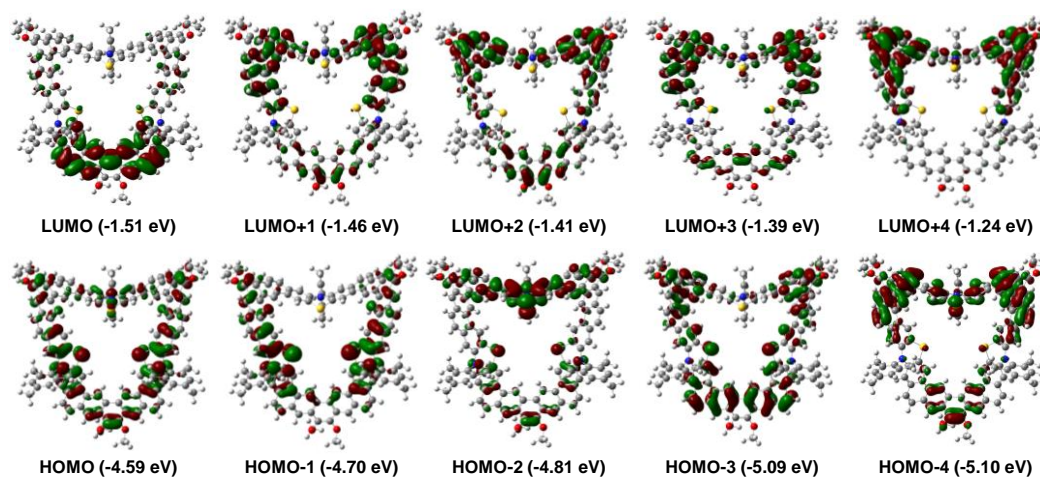

**Figure S14.** Calculated frontier orbitals and energy levels of PTZ2.

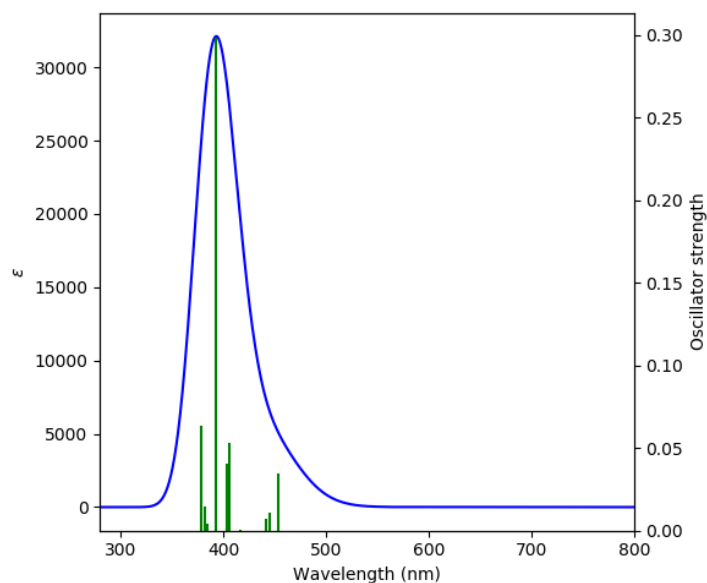

**Figure S15.** TD-DFT simulated spectrum of **PTZ1** in toluene.

**Table S4.** Selected TD-DFT (RB3LYP/6-31G(d,p)) calculated energies, oscillator strength and compositions of major electronic transitions of **PTZ1**.

| Wavelength(nm) | Osc.Strength(f) | Major contributions              |
|----------------|-----------------|----------------------------------|
| 453.2249       | 0.0349          | HOMO->LUMO (89%)                 |
| 444.6587       | 0.0107          | HOMO->L+1 (53%), HOMO->L+2 (38%) |
| 441.6492       | 0.0069          | HOMO->L+1 (33%), HOMO->L+2 (56%) |
| 417.2164       | 0.0002          | H-1->LUMO (91%)                  |
| 405.4421       | 0.0531          | H-1->L+1 (60%), H-1->L+2 (24%)   |
| 403.3974       | 0.0402          | H-1->L+1 (23%), H-1->L+2 (58%)   |
| 392.9395       | 0.2985          | H-1->L+1 (11%), HOMO->L+3 (62%)  |
| 384.9126       | 0.0039          | H-2->LUMO (65%)                  |
| 381.713        | 0.0145          | H-4->L+1 (12%), H-3->LUMO (76%)  |
| 378.4621       | 0.0634          | H-3->L+2 (13%), H-2->L+1 (57%)   |

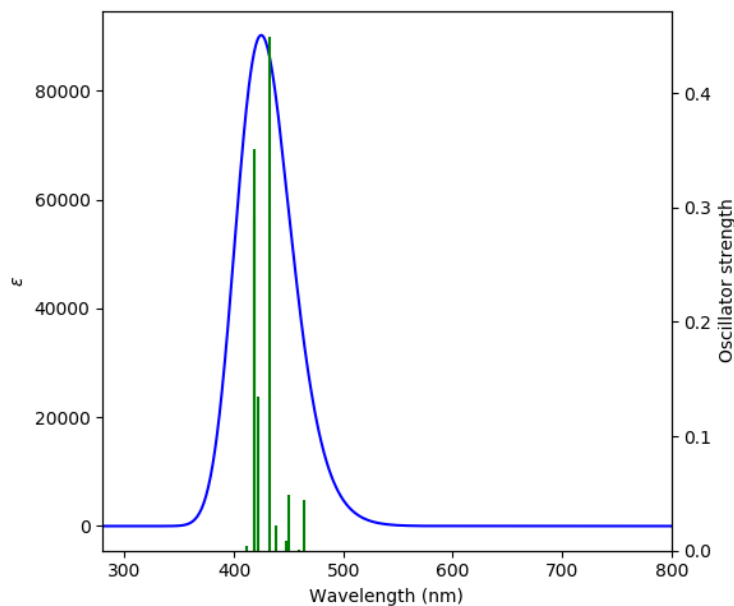

**Figure S16.** TD-DFT simulated spectrum of **PTZ2** in toluene.

**Table S5.** Selected TD-DFT (RB3LYP/6-31G(d,p)) calculated energies, oscillator strength and compositions of major electronic transitions of **PTZ2**.

| Wavelength (nm) | Osc.Strength(f) | Major contributions                                              |
|-----------------|-----------------|------------------------------------------------------------------|
| 464.2038003     | 0.0448          | HOMO->LUMO (80%)                                                 |
| 459.4048948     | 0.0013          | H-1->LUMO (21%), HOMO->L+1 (60%)                                 |
| 449.8864001     | 0.0485          | HOMO->L+2 (75%)                                                  |
| 447.4509835     | 0.0086          | H-1->L+1 (27%), HOMO->L+3 (55%)                                  |
| 438.8354972     | 0.0218          | H-1->LUMO (64%), HOMO->L+1 (12%)                                 |
| 432.5130573     | 0.4496          | H-1->L+2 (53%), HOMO->L+4 (22%)                                  |
| 421.7005987     | 0.1352          | H-2->L+1 (14%), H-2->L+2 (26%), H-1->L+3 (28%), HOMO->L+5 (22%)  |
| 418.596823      | 0.2904          | H-2->LUMO (10%), H-2->L+1 (12%), H-1->L+1 (33%), HOMO->L+3 (10%) |
| 418.1873752     | 0.3507          | H-2->L+1 (41%), H-1->L+1 (10%), HOMO->L+5 (12%)                  |
| 411.6751104     | 0.0036          | H-2->LUMO (41%), H-2->L+3 (13%), HOMO->L+3 (20%)                 |

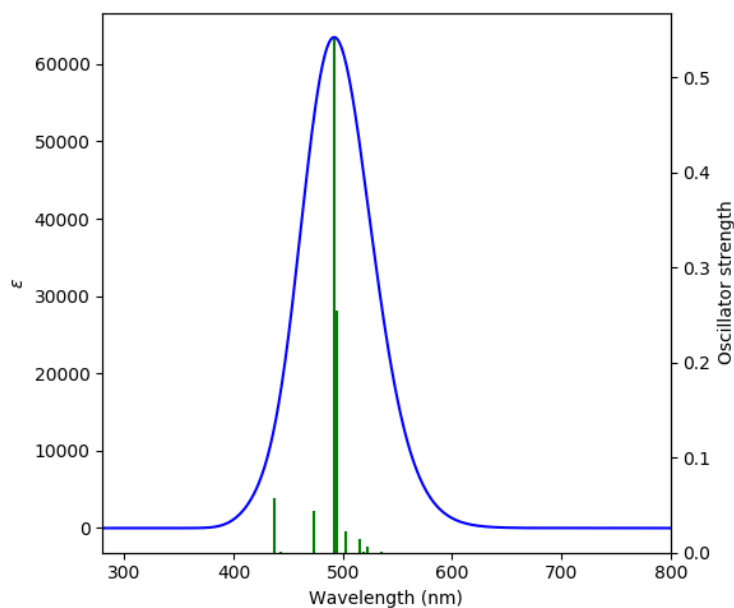

**Figure S17.** TD-DFT simulated spectrum of **PTZ1-Oxi** in toluene.

**Table S6.** Selected TD-DFT (RB3LYP/6-31G(d,p)) calculated energies, oscillator strength and compositions of major electronic transitions of **PTZ1-Oxi**.

| Wavelength (nm) | Osc.Strength(f) | Major contributions                                               |
|-----------------|-----------------|-------------------------------------------------------------------|
| 535.2914        | 0.0011          | HOMO->LUMO (93%)                                                  |
| 522.1266        | 0.0059          | H-5->LUMO (26%), H-5->L+1 (36%), H-2->LUMO (11%), HOMO->L+1 (13%) |
| 519.0229        | 0.0009          | H-7->LUMO (20%), H-7->L+1 (14%), H-6->LUMO (29%), H-6->L+1 (15%)  |
| 515.7412        | 0.014           | H-5->L+1 (12%), H-2->LUMO (25%), HOMO->L+1 (36%)                  |
| 502.1839        | 0.022           | H-3->LUMO (34%), H-2->L+1 (41%), HOMO->L+1 (11%)                  |
| 494.7691        | 0.2551          | H-3->L+1 (11%), H-2->LUMO (24%), H-1->LUMO (16%), HOMO->L+1 (33%) |
| 492.0398        | 0.5409          | H-2->LUMO (10%), H-1->LUMO (82%)                                  |
| 474.1088        | 0.0439          | H-1->L+1 (97%)                                                    |
| 443.2915        | 0.0004          | H-3->LUMO (56%), H-2->L+1 (43%)                                   |
| 437.3494        | 0.0574          | H-3->L+1 (76%), H-2->LUMO (21%)                                   |

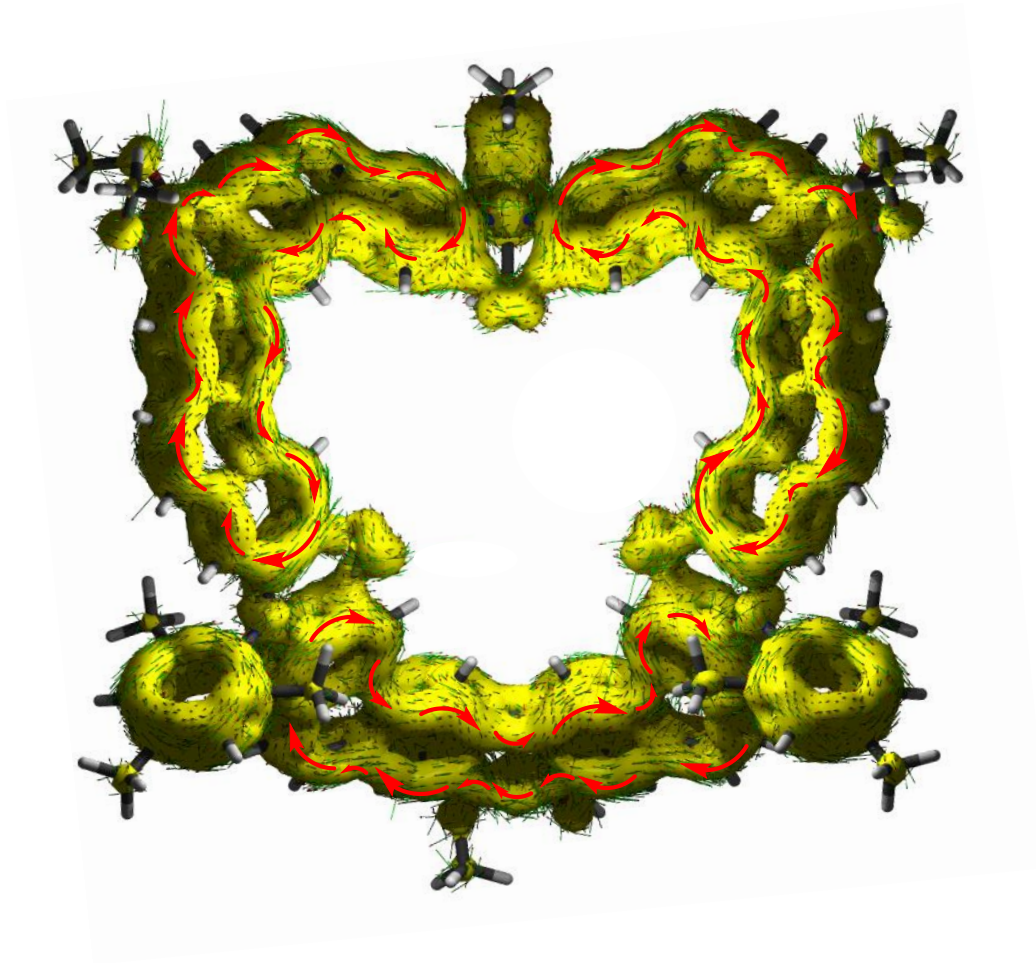

**Figure S18.** Calculated (RB3LYP/6-31G(d,p)) ACID plot (contribution from  $\pi$  electrons only) of **PTZ2** with isovalues of 0.025. The magnetic field is perpendicular to the XY plane and point out through the paper.

**Table S7.** Calculated (B97-2/pcSseg-1) and experiment chemical shift of  $^1\text{H}$  NMR for **PTZ1** and **PTZ1-Oxi** in  $\text{CDCl}_3$ . The distribute of aromatic protons were depend on the calculated results.

| <b>PTZ1</b>     |                      |        | <b>PTZ1-Oxi</b> |                      |        |
|-----------------|----------------------|--------|-----------------|----------------------|--------|
| Aromatic Proton | Chemical Shift (ppm) |        | Aromatic Proton | Chemical Shift (ppm) |        |
|                 | Exp.                 | Cal.   |                 | Exp.                 | Cal.   |
| H <sub>a</sub>  | 10.301               | 10.852 | H <sub>a</sub>  | 9.972                | 10.221 |
| H <sub>b</sub>  | 9.158                | 9.561  | H <sub>b</sub>  | 10.278               | 10.366 |
| H <sub>c</sub>  | 8.542                | 8.956  | H <sub>c</sub>  | 8.800                | 9.110  |
| H <sub>d</sub>  | 7.785                | 8.107  | H <sub>d</sub>  | 7.895                | 8.210  |
| H <sub>e</sub>  | 7.452                | 7.632  | H <sub>e</sub>  | 7.652                | 7.857  |
| H <sub>f</sub>  | 7.282                | 7.632  | H <sub>f</sub>  | 7.327                | 7.653  |
| H <sub>g</sub>  | 6.573                | 6.724  | H <sub>g</sub>  | 7.092                | 7.284  |

#### 4. X-ray crystallographic data

**Table S8.** X-ray crystal data and structure refinement details for **PTZ1** (CCDC 2172358) and **PTZ1-Oxi** (CCDC 2172326).

|                                                            | <b>PTZ1</b>                                                                  | <b>PTZ1-Oxi</b>                                                                               |
|------------------------------------------------------------|------------------------------------------------------------------------------|-----------------------------------------------------------------------------------------------|
| formula                                                    | C <sub>96</sub> H <sub>85</sub> N <sub>3</sub> O <sub>4</sub> S <sub>2</sub> | C <sub>80</sub> H <sub>48</sub> Cl <sub>16</sub> N <sub>2</sub> O <sub>8</sub> S <sub>2</sub> |
| formula wt.                                                | 1408.78                                                                      | 1442.02                                                                                       |
| <i>T</i> (K)                                               | 173(2)                                                                       | 173(2)                                                                                        |
| wavelength (Å)                                             | 1.54178                                                                      | 1.54178                                                                                       |
| crystal size                                               | 0.150 × 0.120 × 0.100                                                        | 0.160 × 0.140 × 0.120                                                                         |
| crystal syst.                                              | Monoclinic                                                                   | Triclinic                                                                                     |
| space group                                                | P 2 <sub>1</sub> /c                                                          | P-1                                                                                           |
| <i>a</i> (Å)                                               | 20.891(5)                                                                    | 12.745(4)                                                                                     |
| <i>b</i> (Å)                                               | 8.271(3)                                                                     | 14.782(4)                                                                                     |
| <i>c</i> (Å)                                               | 44.433(12)                                                                   | 19.522(4)                                                                                     |
| <i>α</i> (deg.)                                            | 90                                                                           | 82.434(12)                                                                                    |
| <i>β</i> (deg.)                                            | 102.813(10)                                                                  | 83.954(19)                                                                                    |
| <i>γ</i> (deg.)                                            | 90                                                                           | 80.211(17)                                                                                    |
| <i>V</i> (Å <sup>3</sup> )                                 | 7487(4)                                                                      | 3579.9(16)                                                                                    |
| <i>Z</i> / <i>D</i> <sub>calcd.</sub> (mg/m <sup>3</sup> ) | 4/1.214                                                                      | 2/1.227                                                                                       |
| <i>μ</i> (mm <sup>-1</sup> )                               | 1.069                                                                        | 3.206                                                                                         |
| <i>F</i> (000)                                             | 2984.0                                                                       | 1480                                                                                          |
| max / min transmission                                     | 0.752/0.594                                                                  | 0.753/0.660                                                                                   |

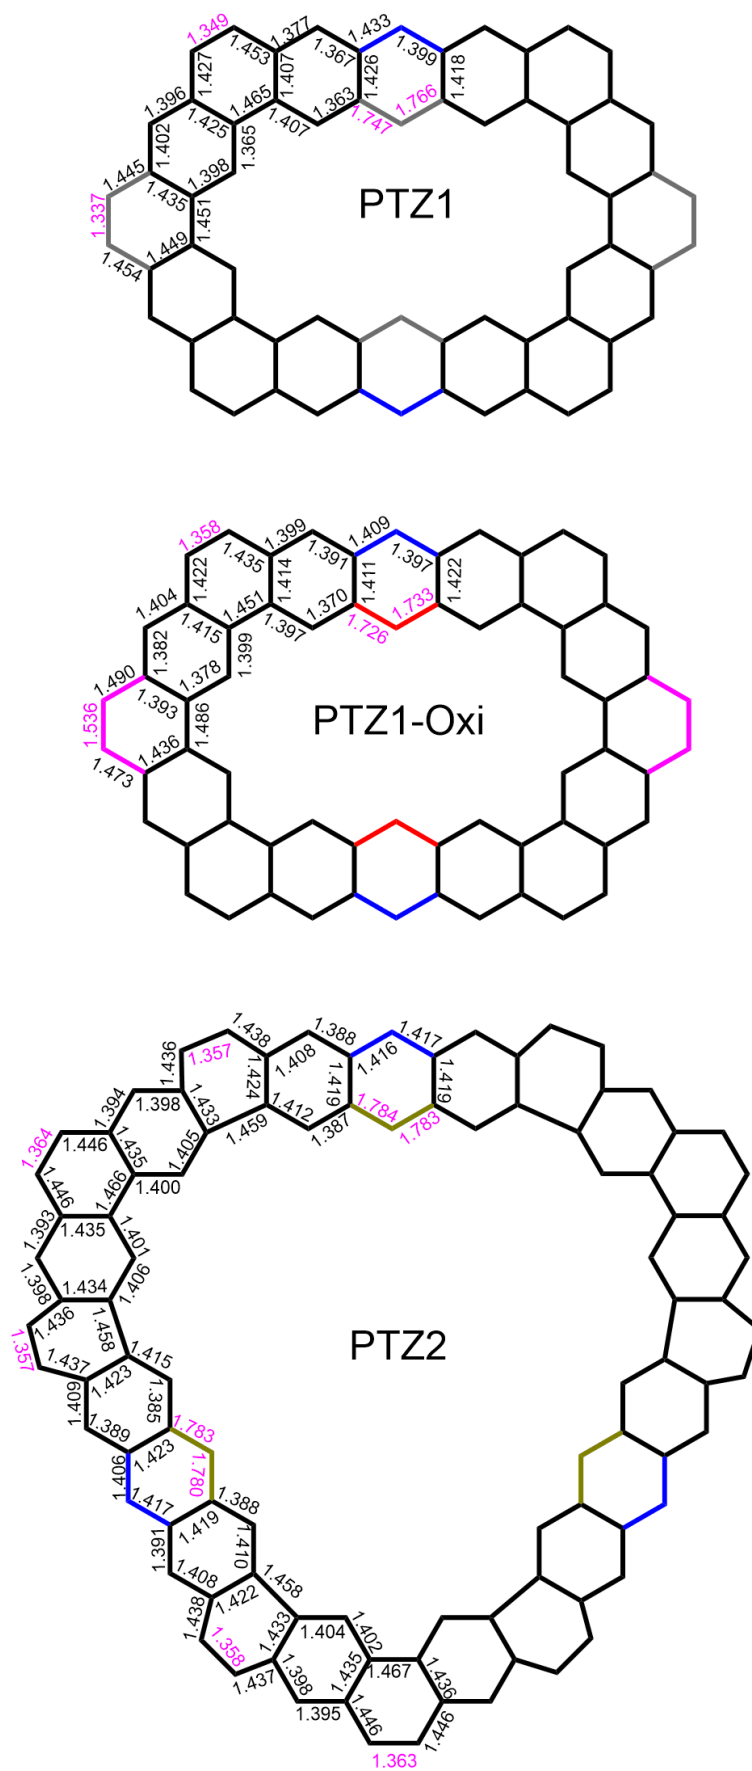

**Figure S19.** Selected bond lengths (in Å) of PTZ1, PTZ1-Oxi and PTZ2.



## 5. $^1\text{H}$ , $^{13}\text{C}$ NMR and mass spectra of the target compounds

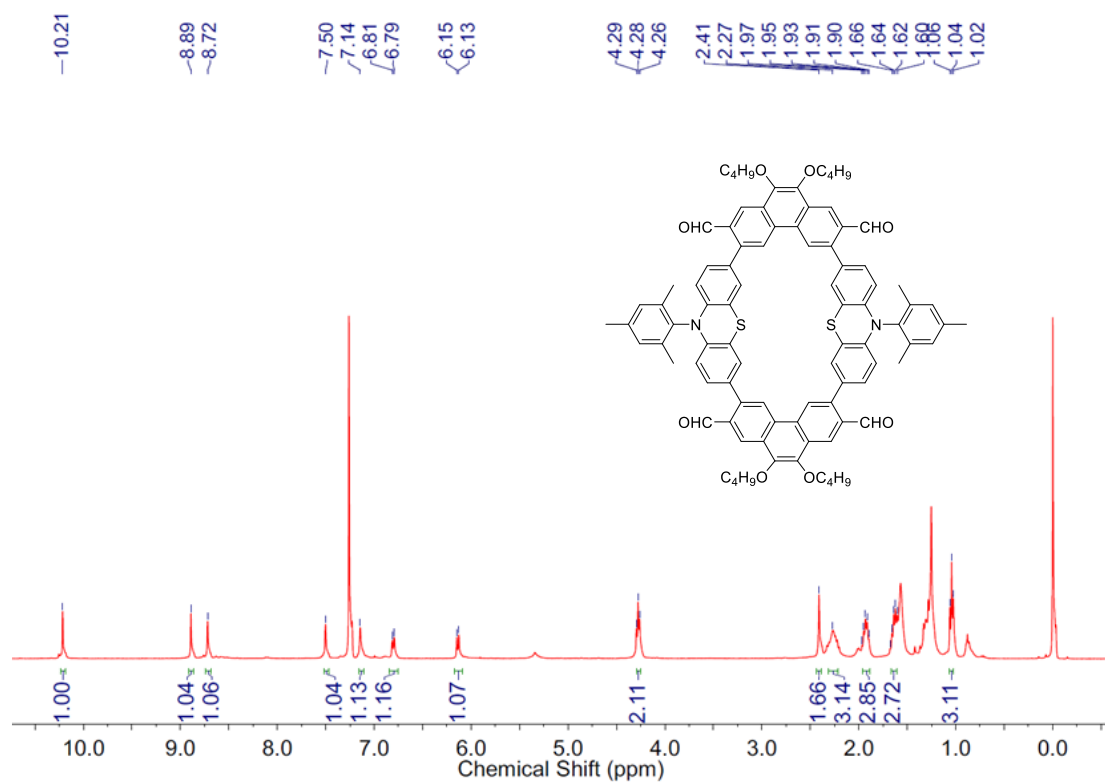

**Figure S20.**  $^1\text{H}$  NMR spectrum (400 MHz) of **3a** in  $\text{CDCl}_3$  at 298 K.

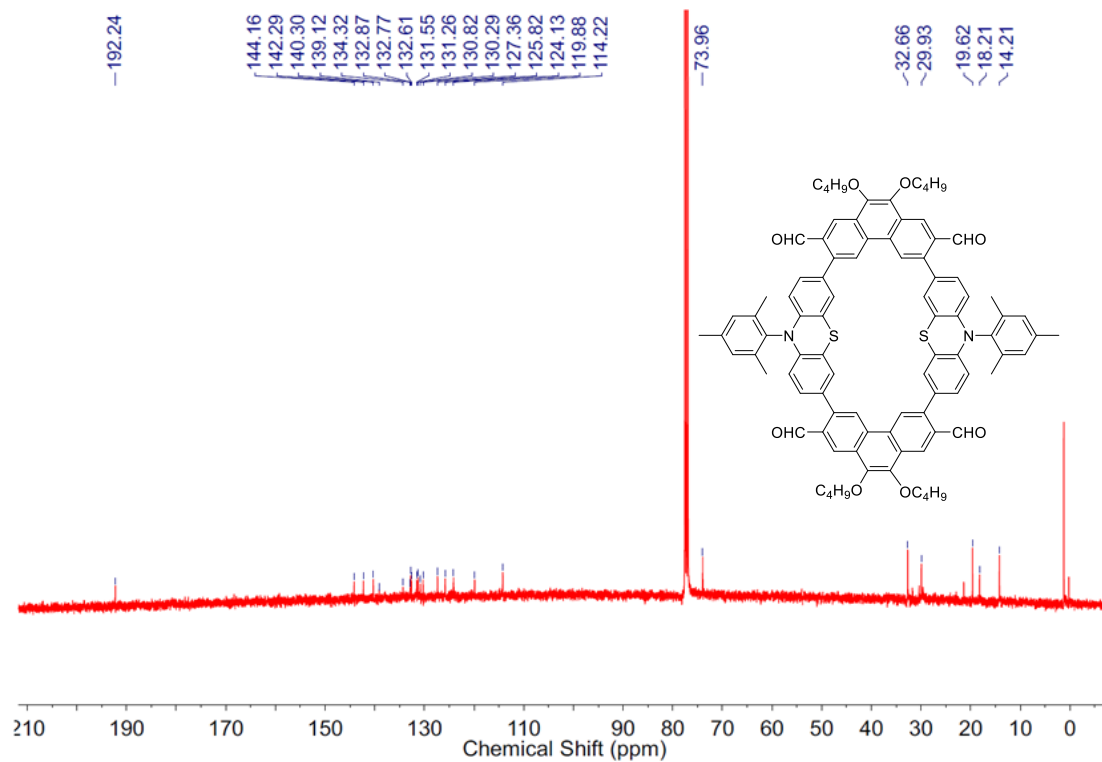

**Figure S21.**  $^{13}\text{C}$  NMR spectrum (101 MHz) of **3a** in  $\text{CDCl}_3$  at 298 K.

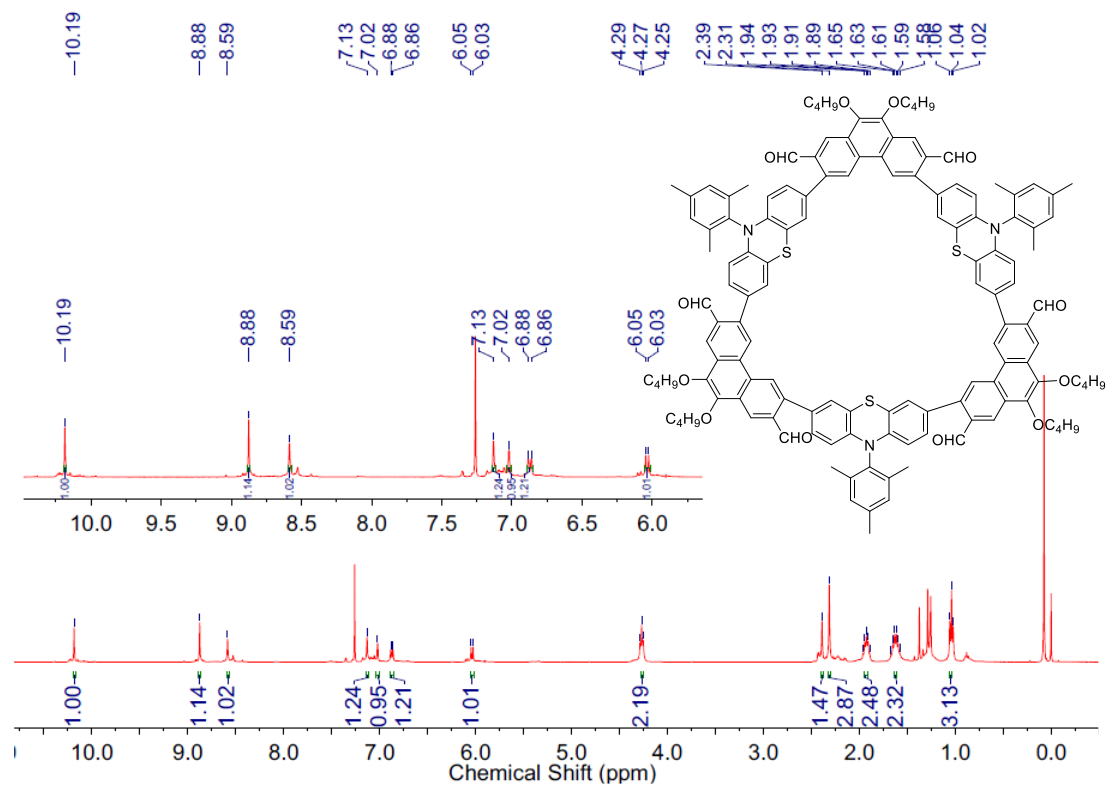

Figure S22.  $^1\text{H}$  NMR spectrum (400 MHz) of **3b** in  $\text{CDCl}_3$  at 298 K.

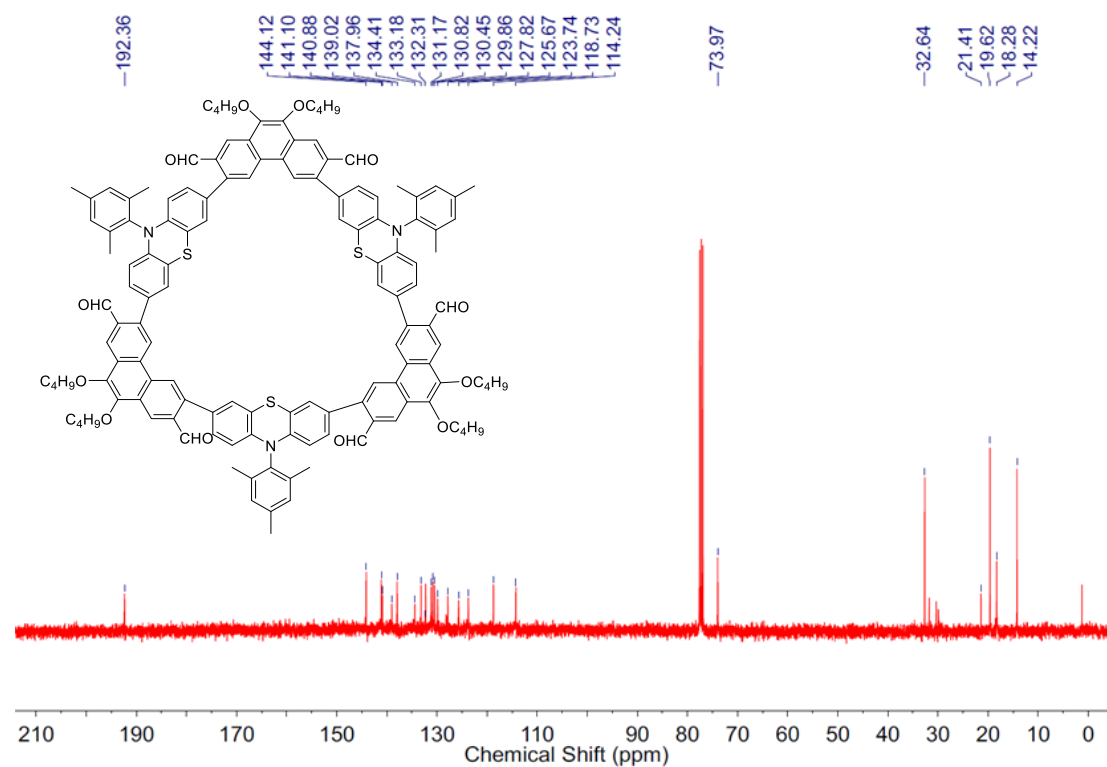

Figure S23.  $^{13}\text{C}$  NMR spectrum (101 MHz) of **3b** in  $\text{CDCl}_3$  at 298 K.

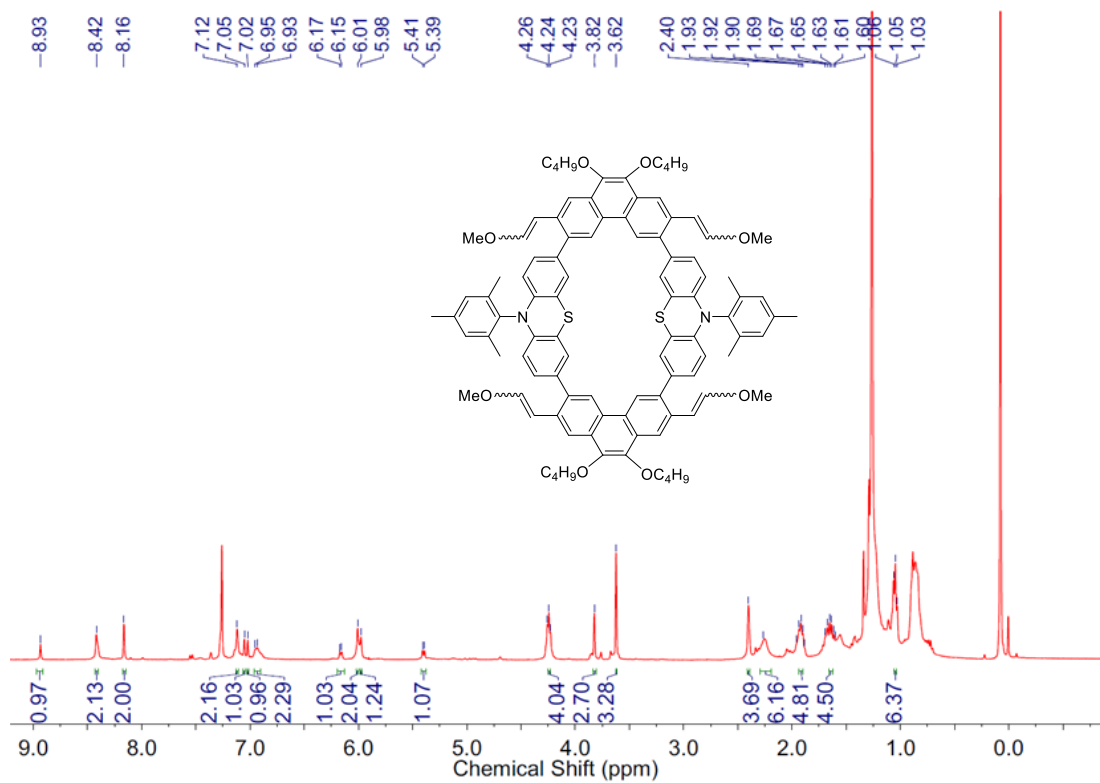

**Figure S24.** <sup>1</sup>H NMR spectrum (400 MHz) of **4a** in CDCl<sub>3</sub> at 298 K.

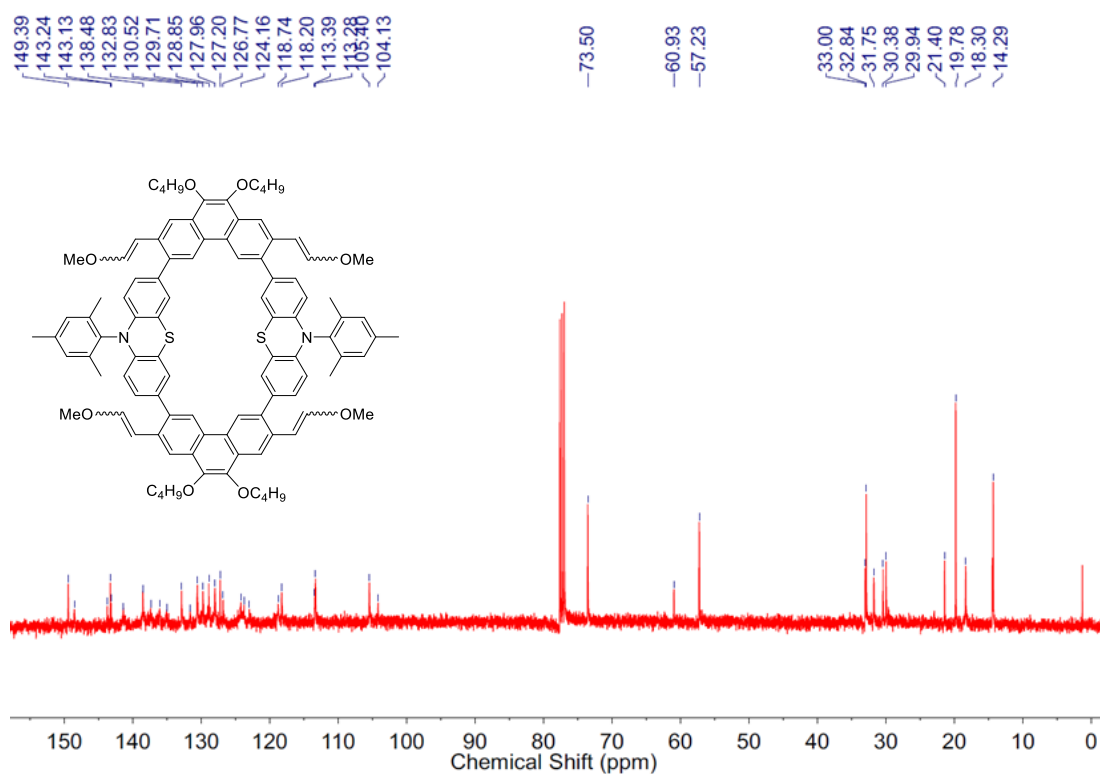

**Figure S25.** <sup>13</sup>C NMR spectrum (101 MHz) of **4a** in CDCl<sub>3</sub> at 298 K.

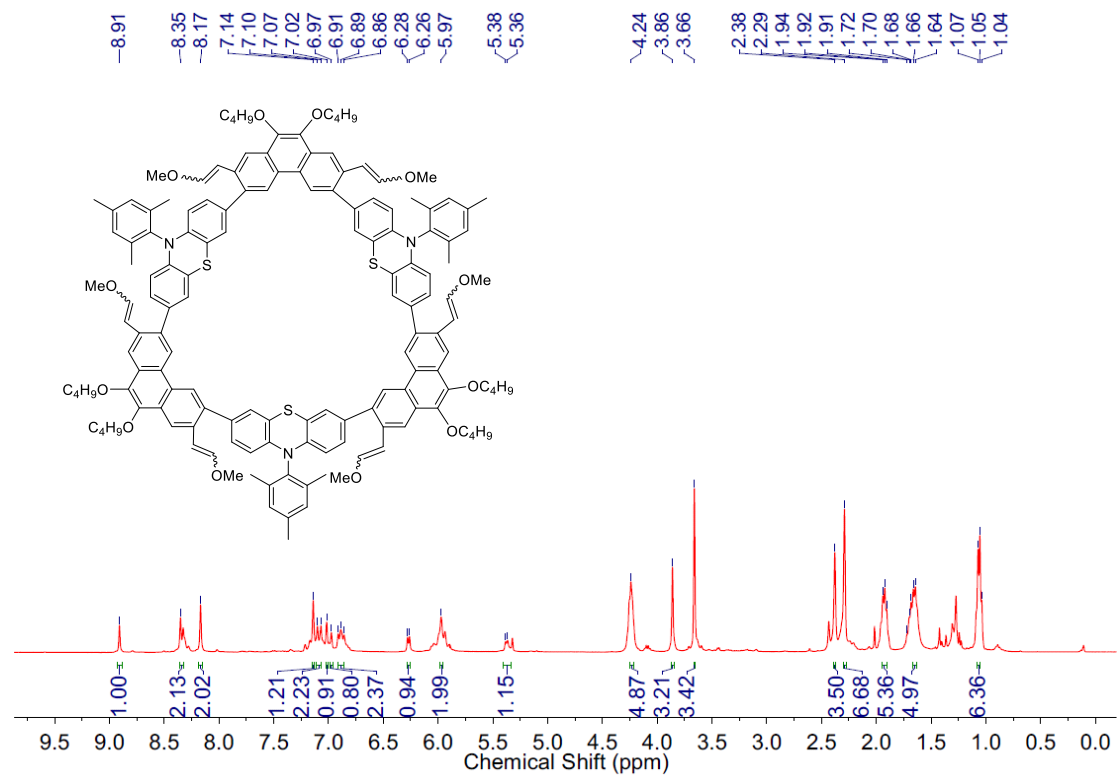

**Figure S26.**  $^1\text{H}$  NMR spectrum (400 MHz) of **4b** in  $\text{CD}_2\text{Cl}_2$  at 298 K.

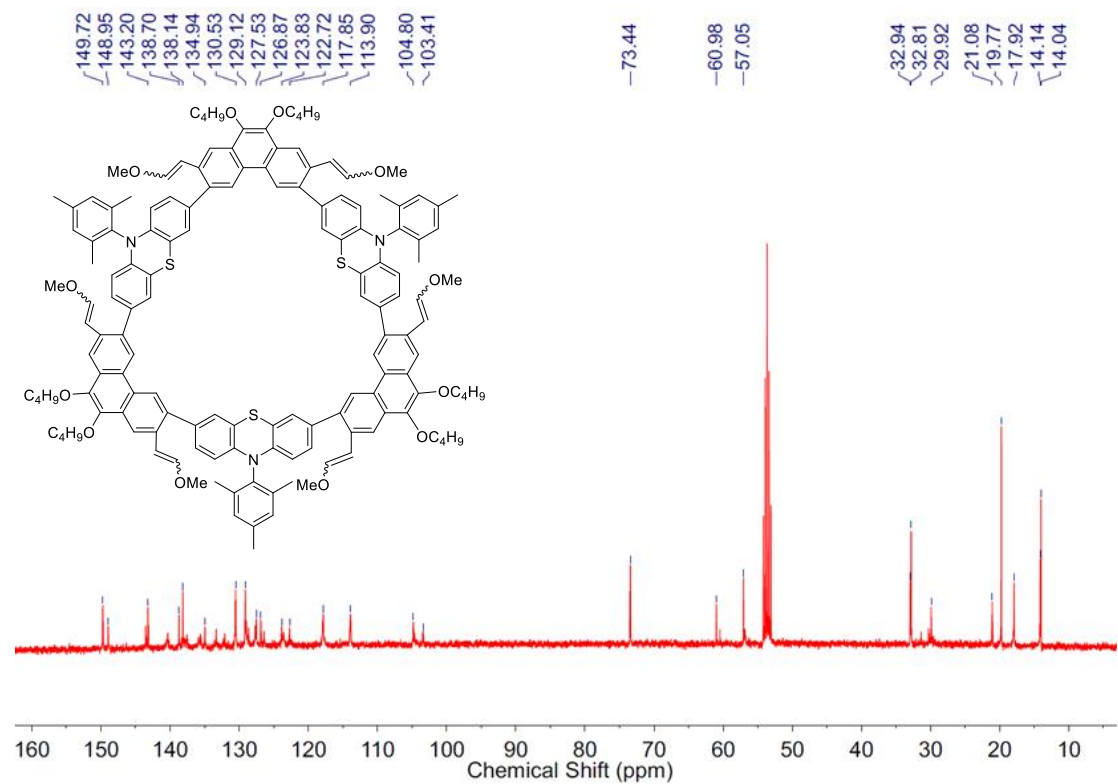

**Figure S27.**  $^{13}\text{C}$  NMR spectrum (101 MHz) of **4b** in  $\text{CD}_2\text{Cl}_2$  at 298 K.

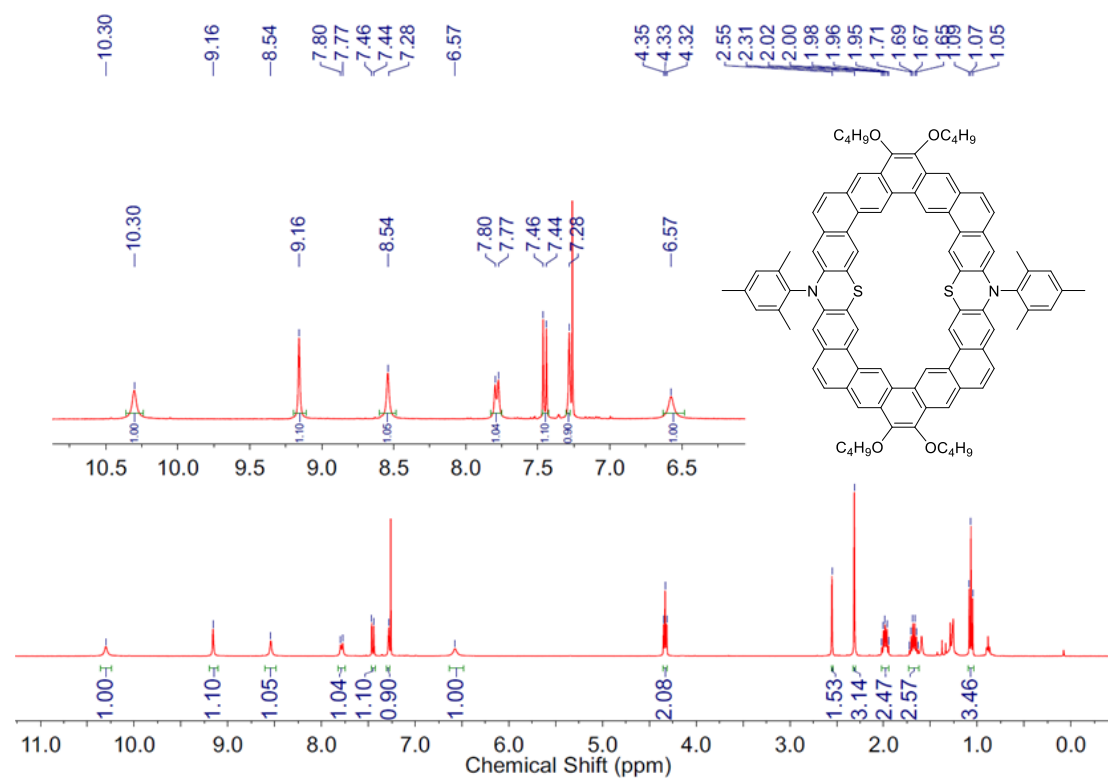

**Figure S28.**  $^1\text{H}$  NMR spectrum (400 MHz) of **PTZ1** in  $\text{CDCl}_3$  at 298 K.

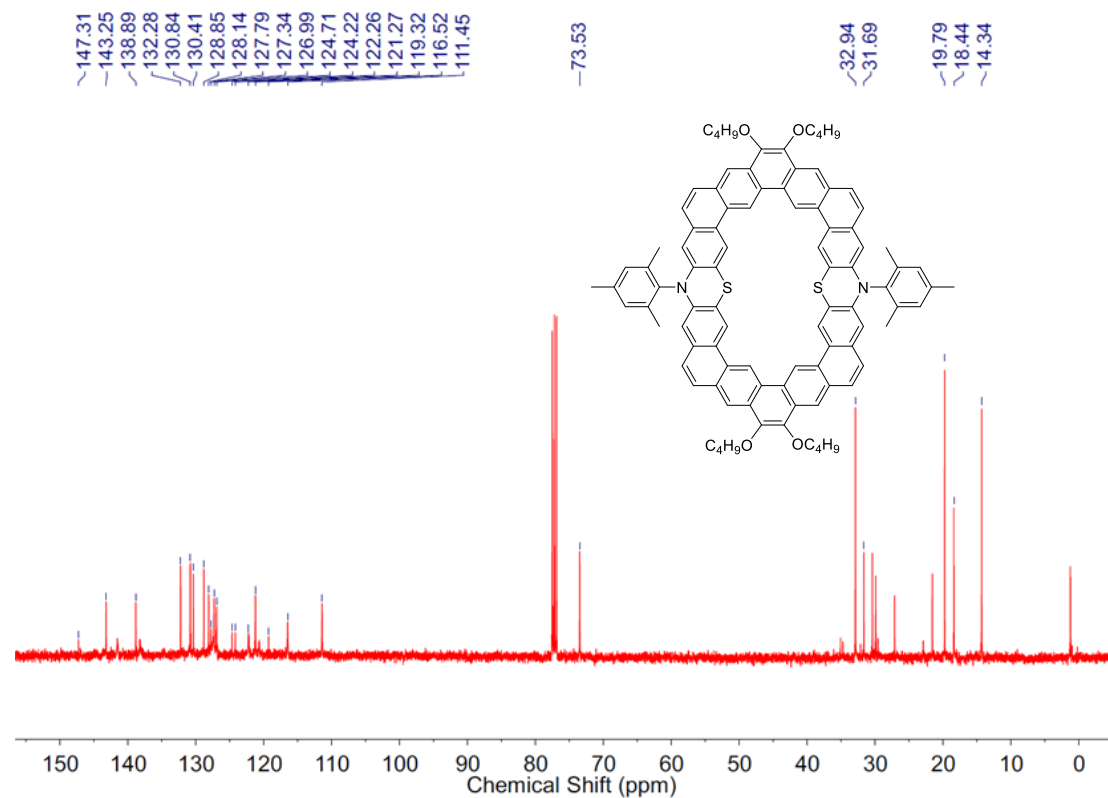

**Figure S29.**  $^{13}\text{C}$  NMR spectrum (101 MHz) of **PTZ1** in  $\text{CDCl}_3$  at 298 K.

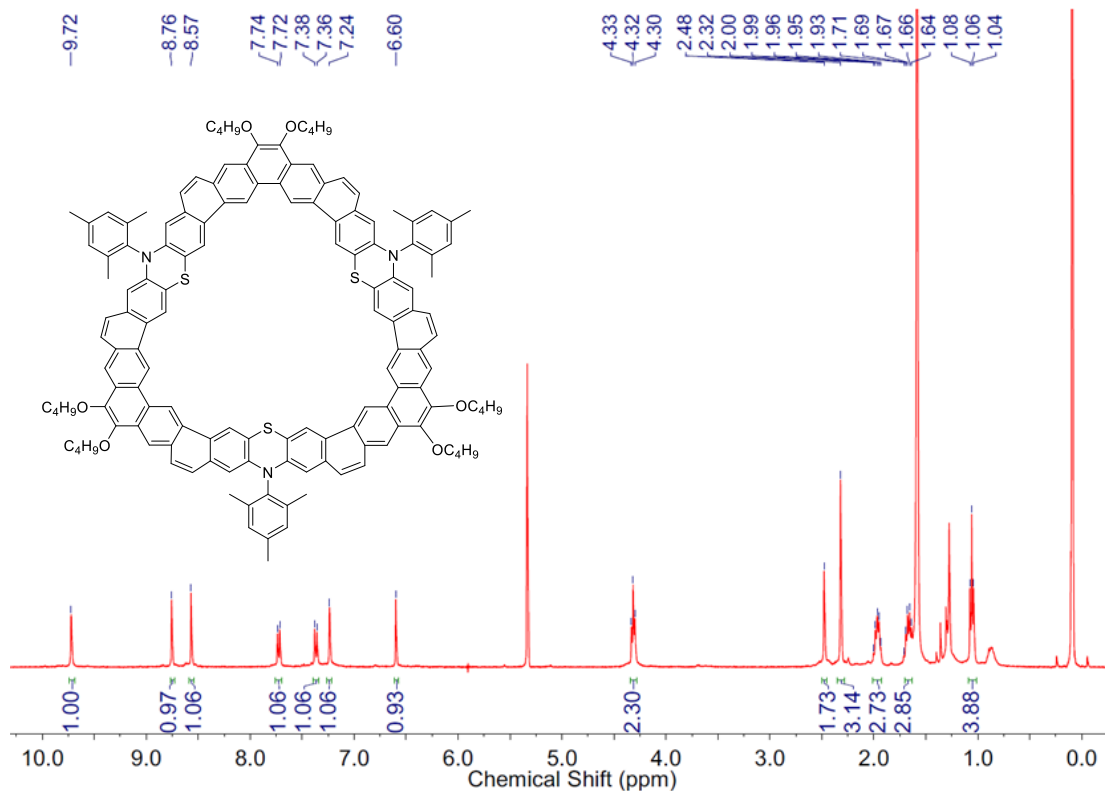

**Figure S30.** <sup>1</sup>H NMR spectrum (400 MHz) of PTZ2 in CD<sub>2</sub>Cl<sub>2</sub> at 298 K.

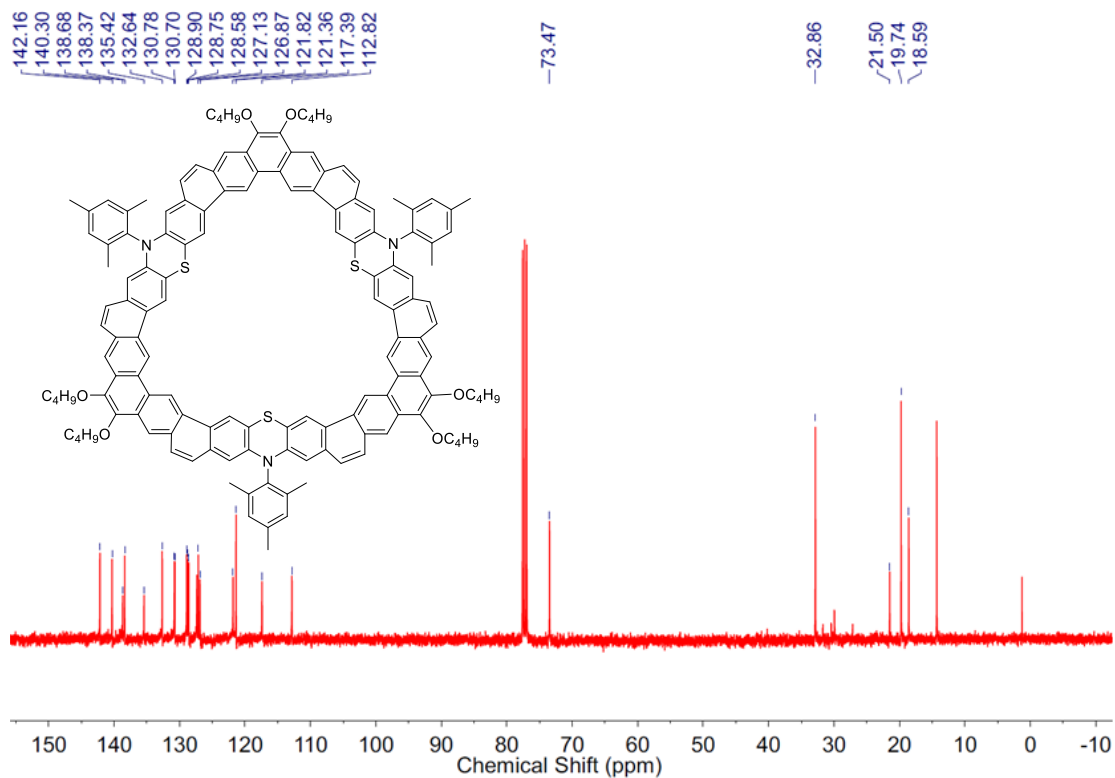

**Figure S31.** <sup>13</sup>C NMR spectrum (101 MHz) of PTZ2 in CDCl<sub>3</sub> at 298 K.

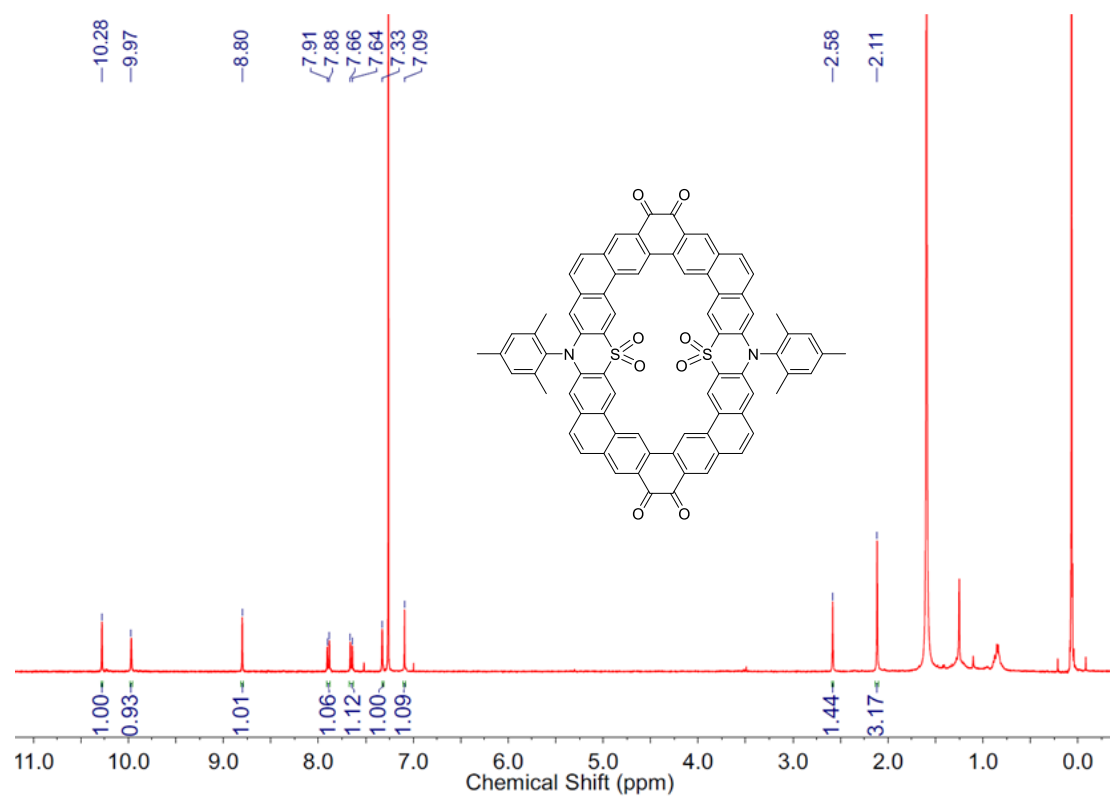

**Figure S32.**  $^1\text{H}$  NMR spectrum (400 MHz) of **PTZ1-Oxi** in  $\text{CDCl}_3$  at 298 K.

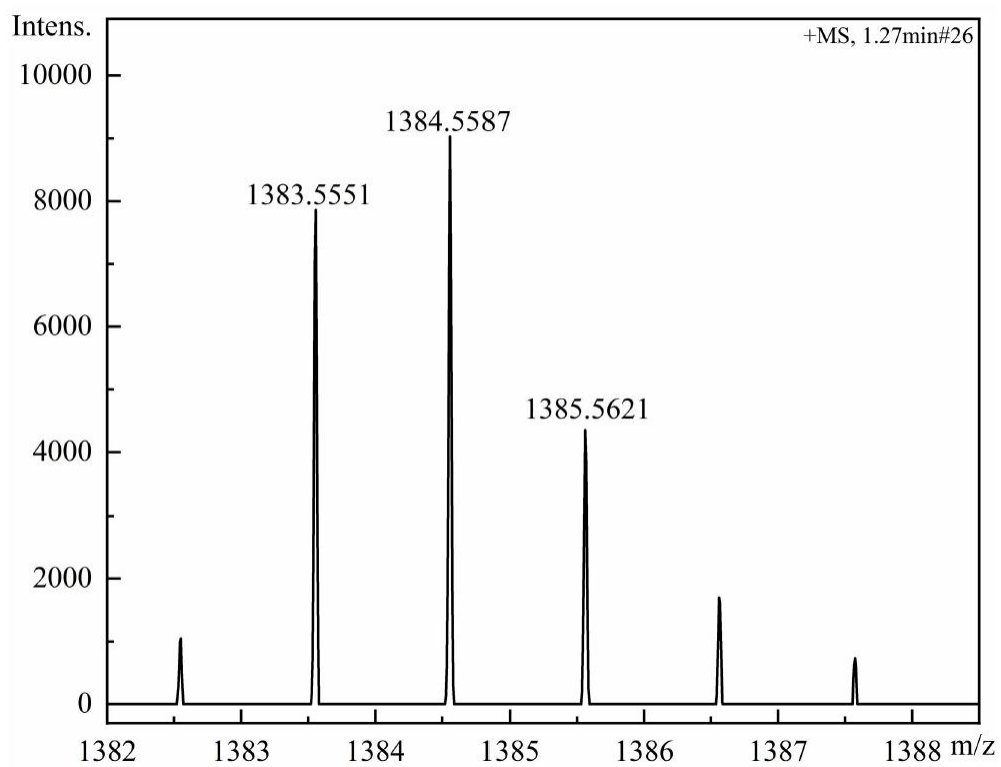

**Figure S33.** HR mass spectrum (APCI) of **3a**.

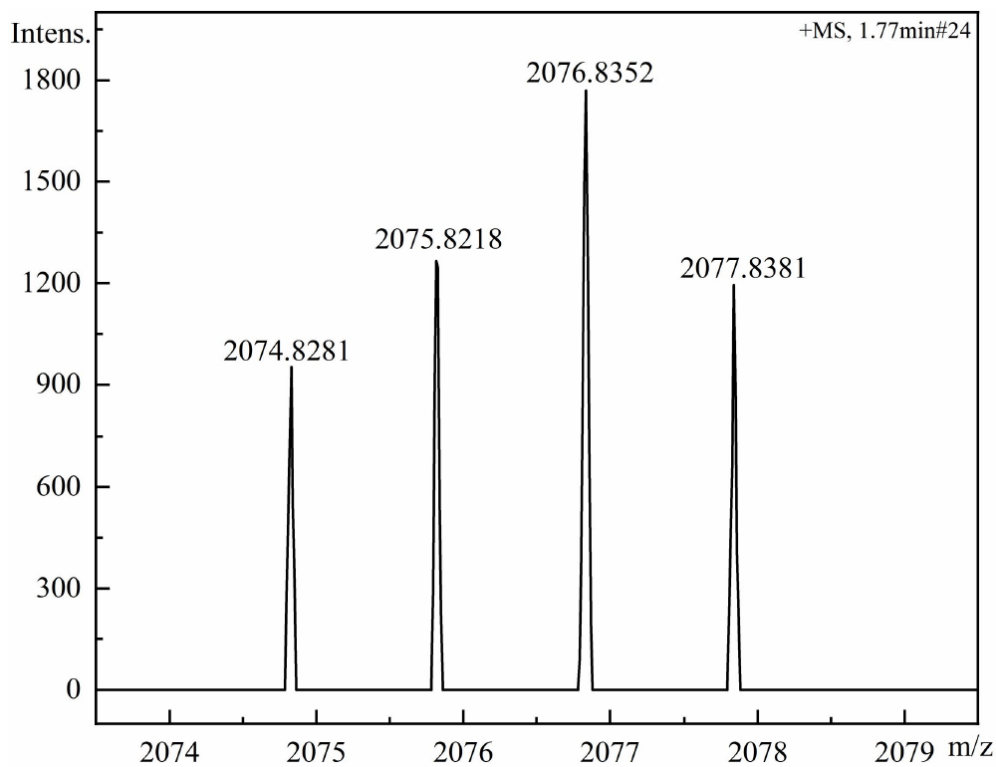

**Figure S34.** HR mass spectrum (APCI) of 3b.

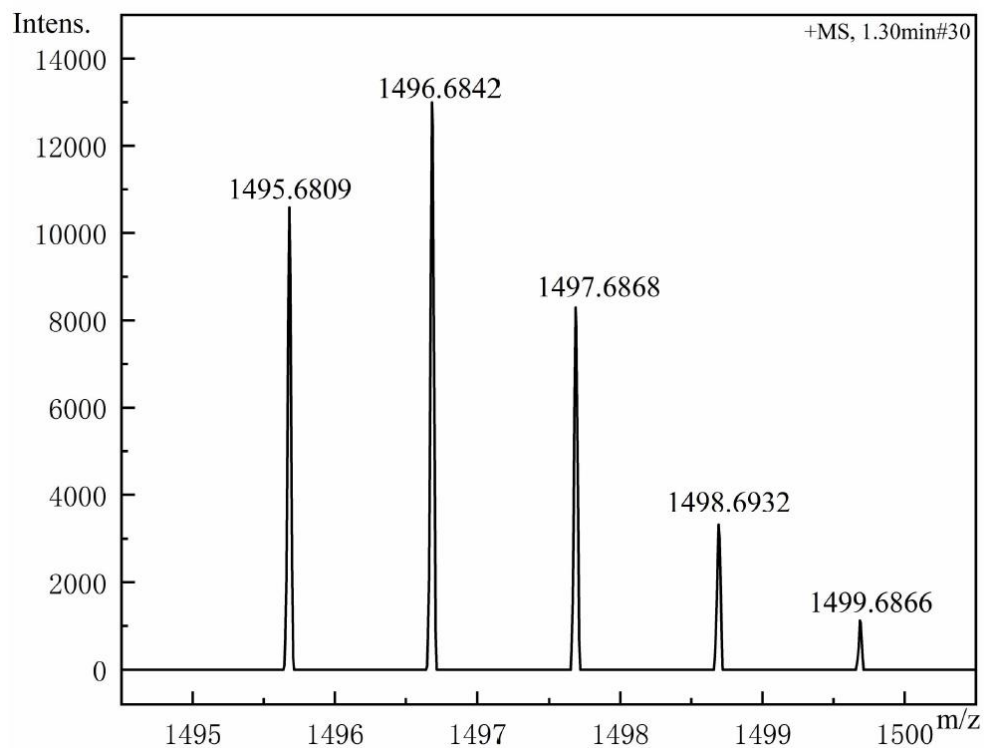

**Figure S35.** HR mass spectrum (APCI) of 4a.



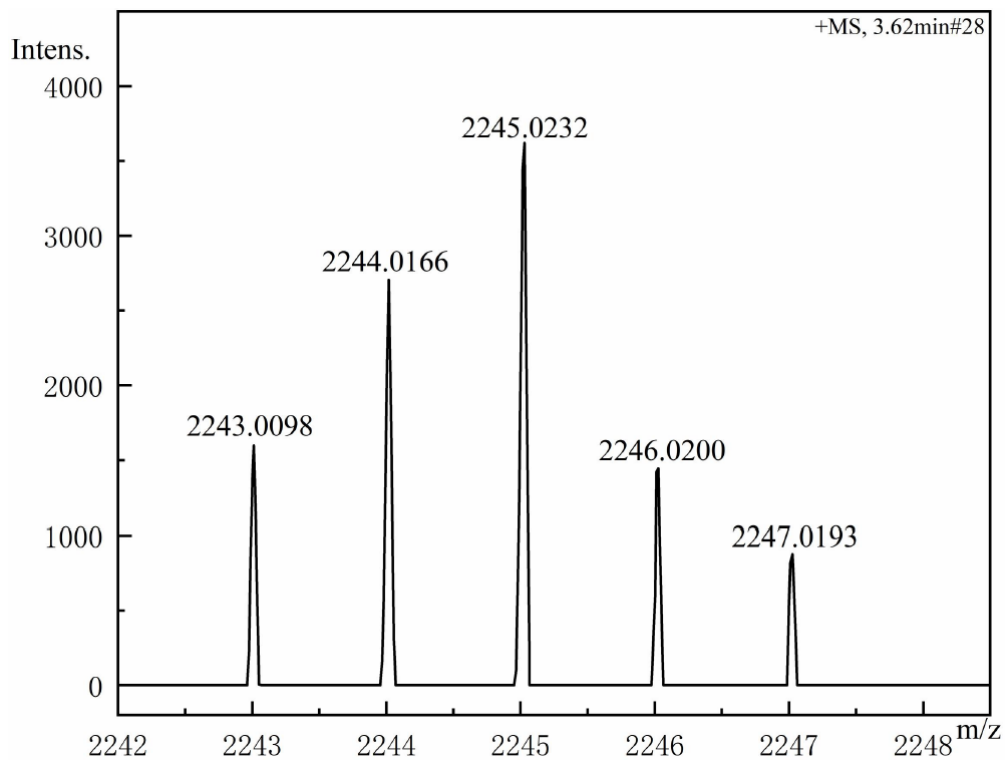

**Figure S36.** HR mass spectrum (APCI) of 4b.

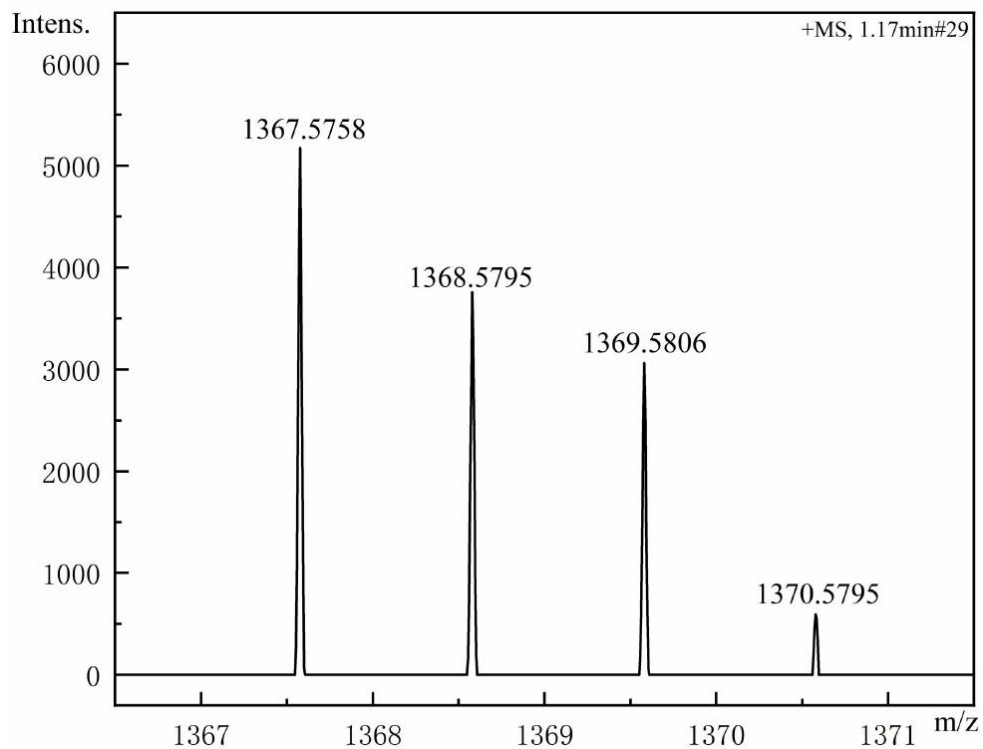

**Figure S37.** HR mass spectrum (APCI) of PTZ1.

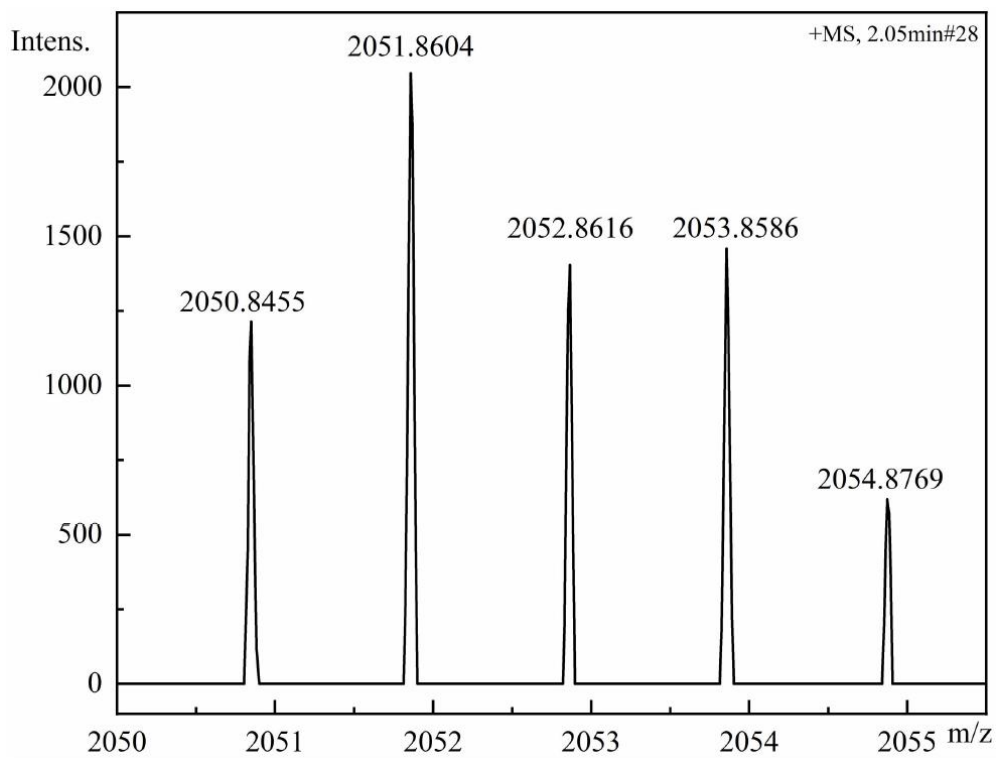

**Figure S38.** HR mass spectrum (APCI) of PTZ2.

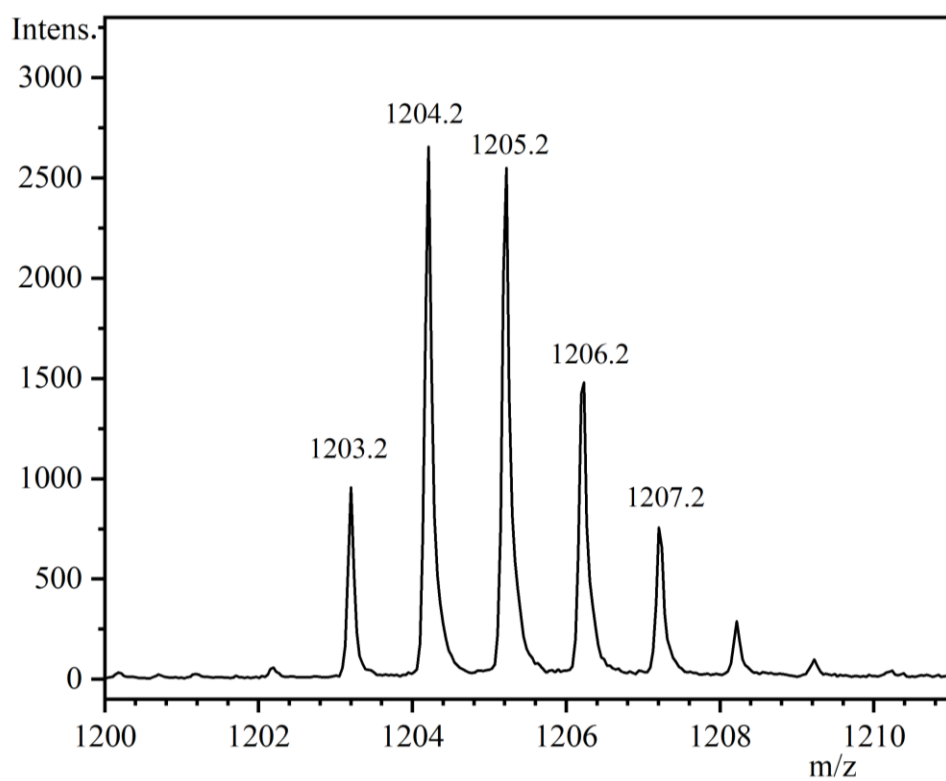

**Figure S39.** MALDI-TOF Mass spectrum of PTZ1-Oxi.

## 6. Reference

1. Cheng, Y.-J.; Yu, S.-Y.; Lin, S.-C.; Lin, J. T.; Chen, L.-Y.; Hsiu, D.-S.; Wen, Y. S.; Lee, M. M.; Sun, S.-S., A phenothiazine/dimesitylborane hybrid material as a bipolar transport host of red phosphor. *J. Mater. Chem. C* **2016**, *4* (40), 9499-9508.
2. Gregolińska, H.; Majewski, M.; Chmielewski, P. J.; Gregoliński, J.; Chien, A.; Zhou, J.; Wu, Y.-L.; Bae, Y. J.; Wasielewski, M. R.; Zimmerman, P. M.; Stępień, M., Fully Conjugated [4]Chrysaorene. Redox-Coupled Anion Binding in a Tetraradicaloid Macrocycle. *J. Am. Chem. Soc.* **2018**, *140* (43), 14474-14480.
3. Lopez-Garcia, F.; Dong, S.; Han, Y.; Cheng Lee, J. J.; Ng, P. W.; Chi, C., Cyclobis[2,5-(thiophenedimethane)-4,4'-(triphenylamine)] versus Its S,S-Dioxidized Macrocycle: Global Antiaromaticity and Intramolecular Dynamics. *Org. Lett.* **2021**, *23* (16), 6382-6386.
4. Jiménez, V. G.; David, A. H. G.; Cuerva, J. M.; Blanco, V.; Campaña, A. G., A Macrocycle Based on a Heptagon-Containing Hexa-peri-hexabenzocoronene. *Angew. Chem. Int. Ed.* **2020**, *59* (35), 15124-15128.
5. Barendt, T. A.; Myers, W. K.; Cornes, S. P.; Lebedeva, M. A.; Porfyrakis, K.; Marques, I.; Félix, V.; Beer, P. D., The Green Box: An Electronically Versatile Perylene Diimide Macrocyclic Host for Fullerenes. *J. Am. Chem. Soc.* **2020**, *142* (1), 349-364.
6. Thordarson, P., Determining association constants from titration experiments in supramolecular chemistry. *Chem. Soc. Rev.* **2011**, *40* (3), 1305-1323.
7. Brynn Hibbert, D.; Thordarson, P., The death of the Job plot, transparency, open science and online tools, uncertainty estimation methods and other developments in supramolecular chemistry data analysis. *Chem. Commun.* **2016**, *52* (87), 12792-12805.
8. Frisch, M. J.; Trucks, G. W.; Schlegel, H. B.; Scuseria, G. E.; Robb, M. A.; Cheeseman, J. R.; Scalmani, G.; Barone, V.; Mennucci, B.; Petersson, G. A.; Nakatsuji, H.; Caricato, M.; Li, X.; Hratchian, H. P.; Izmaylov, A. F.; Bloino, J.; Zheng, G.; Sonnenberg, J. L.; Hada, M.; Ehara, M.; Toyota, K.; Fukuda, R.; Hasegawa, J.; Ishida, M.; Nakajima, T.; Honda, Y.; Kitao, O.; Nakai, H.; Vreven, T.; Montgomery, J. A.; Jr.; Peralta, J. E.; Ogliaro, F.; Bearpark, M.; Heyd, J. J.; Brothers, E.; Kudin, K. N.; Staroverov, V. N.; Keith, T.; Kobayashi, R.; Normand, J.; Raghavachari, K.; Rendell, A.; Burant, J. C.; Iyengar, S. S.; Tomasi, J.; Cossi, M.; Rega, N.; Millam, J. M.; Klene, M.; Knox, J. E.; Cross, J. B.; Bakken, V.; Adamo, C.; Jaramillo, J.; Gomperts, R.; Stratmann, R. E.; Yazyev, O.; Austin, A. J.; Cammi, R.; Pomelli, C.; Ochterski, J. W.; Martin, R. L.; Morokuma, K.; Zakrzewski, V. G.; Voth, G. A.; Salvador, P.; Dannenberg, J. J.; Dapprich, S.; Daniels, A. D.; Farkas, O.; Foresman, J. B.; Ortiz, J. V.; Cioslowski, J.; Fox, D. J. *Gaussian 09 Rev. C.01*, Gaussian, Inc., Wallingford, CT, 2010.
9. Becke, A. D., Density-functional thermochemistry. III. The role of exact exchange. *J. Chem. Phys.* **1993**, *98* (7), 5648-5652.
10. Lee, C.; Yang, W.; Parr, R. G., Development of the Colle-Salvetti correlation-energy formula into a functional of the electron density. *Phys. Rev. B: Condens. Matter* **1988**, *37* (2), 785-789.
11. Yanai, T.; Tew, D. P.; Handy, N. C., A new hybrid exchange–correlation functional using the Coulomb-attenuating method (CAM-B3LYP). *Chem. Phys. Lett.* **2004**, *393* (1), 51-57.

12. Ditchfield, R.; Hehre, W. J.; Pople, J. A., Self-Consistent Molecular-Orbital Methods. IX. An Extended Gaussian-Type Basis for Molecular-Orbital Studies of Organic Molecules. *J. Chem. Phys.* **1971**, *54* (2), 724-728.
13. Hehre, W. J.; Ditchfield, R.; Pople, J. A., Self-Consistent Molecular Orbital Methods. XII. Further Extensions of Gaussian-Type Basis Sets for Use in Molecular Orbital Studies of Organic Molecules. *J. Chem. Phys.* **1972**, *56* (5), 2257-2261.
14. Hariharan, P. C.; Pople, J. A., The influence of polarization functions on molecular orbital hydrogenation energies. *Theoret. Chim. Acta* **1973**, *28* (3), 213-222.
15. Schleyer, P. v. R.; Maerker, C.; Dransfeld, A.; Jiao, H.; van Eikema Hommes, N. J. R., Nucleus-Independent Chemical Shifts: A Simple and Efficient Aromaticity Probe. *J. Am. Chem. Soc.* **1996**, *118* (26), 6317-6318.
16. Lu, T.; Chen, F., Multiwfn: A multifunctional wavefunction analyzer. *J. Comput. Chem.* **2012**, *33* (5), 580-592.
17. Geuenich, D.; Hess, K.; Köhler, F.; Herges, R., Anisotropy of the Induced Current Density (ACID), a General Method To Quantify and Visualize Electronic Delocalization. *Chem. Rev.* **2005**, *105* (10), 3758-3772.
18. Flaig, D.; Maurer, M.; Hanni, M.; Braunger, K.; Kick, L.; Thubauville, M.; Ochsenfeld, C., Benchmarking Hydrogen and Carbon NMR Chemical Shifts at HF, DFT, and MP2 Levels. *J. Chem. Theory Comput.* **2014**, *10* (2), 572-578.
